# Supplementary material for: Cryptosporidiosis Modulates the Gut Microbiome Metabolism and Immune Response in an Infected Host
Source: Preprints.org preprint supplement (doi:10.20944/preprints202104.0528.v1), 2021-04-20
Supplement: Supplementary file 1 [file SD1_Cryptosporidiosis Microbiome response_Intestine.xlsx]

## Sheet: Microbial Prot_Duodenun-Jejunum
Uniprot accession	Description	Combined Log Fold Change	P-value (FDR adjusted)
A0A1Y4GVY4	A0A1Y4GVY4_9FIRM Chaperone protein HtpG OS=Anaerofilum sp. An201 OX=1965588 GN=htpG PE=3 SV=1	-5.34468	0.00733324
A0A3A9HTV6	A0A3A9HTV6_9FIRM Chaperone protein HtpG OS=Anaerotruncus sp. 1XD22-93 OX=2320082 GN=htpG PE=3 SV=1	-5.34468	0.00733324
D4W8E3	D4W8E3_9FIRM Chaperone protein HtpG OS=Turicibacter sanguinis PC909 OX=702450 GN=htpG PE=3 SV=1	-5.34468	0.00733324
E1QVY9	E1QVY9_OLSUV Chaperone protein HtpG OS=Olsenella uli (strain ATCC 49627 / DSM 7084 / CIP 109912 / JCM 12494 / NCIMB 702895 / VPI D76D-27C) OX=633147 GN=htpG PE=3 SV=1	-5.34468	0.00733324
C5MG15	C5MG15_CANTT ATP-dependent molecular chaperone HSC82 OS=Candida tropicalis (strain ATCC MYA-3404 / T1) OX=294747 GN=CTRG_05008 PE=3 SV=1	-5.3115	0.00733324
P15108	HSC82_YEAST ATP-dependent molecular chaperone HSC82 OS=Saccharomyces cerevisiae (strain ATCC 204508 / S288c) OX=559292 GN=HSC82 PE=1 SV=4	-5.3115	0.00733324
P02829	HSP82_YEAST ATP-dependent molecular chaperone HSP82 OS=Saccharomyces cerevisiae (strain ATCC 204508 / S288c) OX=559292 GN=HSP82 PE=1 SV=1	-5.3115	0.00733324
P46598	HSP90_CANAL Heat shock protein 90 homolog OS=Candida albicans (strain SC5314 / ATCC MYA-2876) OX=237561 GN=HSP90 PE=1 SV=1	-5.3115	0.00733324
Q5CU90	Q5CU90_CRYPI Hsp90 (Fragment) OS=Cryptosporidium parvum (strain Iowa II) OX=353152 GN=cgd3_3770 PE=3 SV=1	-5.3115	0.00733324
Q5A017	Q5A017_CANAL Transaldolase OS=Candida albicans (strain SC5314 / ATCC MYA-2876) OX=237561 GN=TAL1 PE=3 SV=1	-2.36665	0.000129669
Q5CRJ4	Q5CRJ4_CRYPI Polyubiquitin with 3 Ub domains (Fragment) OS=Cryptosporidium parvum (strain Iowa II) OX=353152 GN=cgd5_2550 PE=4 SV=1	-1.4919	0.00733324
Q5CYH8	Q5CYH8_CRYPI 60S ribosomal protein L40 (Fragment) OS=Cryptosporidium parvum (strain Iowa II) OX=353152 GN=cgd7_2280 PE=4 SV=1	-1.4919	0.00733324

## Sheet: Microbial Prot_Jejunum-Ileum
Uniprot accession	Description	Combined Log Fold Change	P-value (FDR adjusted)
P00360	G3P1_YEAST Glyceraldehyde-3-phosphate dehydrogenase 1 OS=Saccharomyces cerevisiae (strain ATCC 204508 / S288c) OX=559292 GN=TDH1 PE=1 SV=3	11.0265	2.27315e-06
P00358	G3P2_YEAST Glyceraldehyde-3-phosphate dehydrogenase 2 OS=Saccharomyces cerevisiae (strain ATCC 204508 / S288c) OX=559292 GN=TDH2 PE=1 SV=3	11.0265	2.27315e-06
P00359	G3P3_YEAST Glyceraldehyde-3-phosphate dehydrogenase 3 OS=Saccharomyces cerevisiae (strain ATCC 204508 / S288c) OX=559292 GN=TDH3 PE=1 SV=3	11.0265	2.27315e-06
C5M8A2	C5M8A2_CANTT Histone H2B OS=Candida tropicalis (strain ATCC MYA-3404 / T1) OX=294747 GN=CTRG_02624 PE=3 SV=1	9.67249	0.00200529
P48989	H2B1_CANAL Histone H2B.1 OS=Candida albicans (strain SC5314 / ATCC MYA-2876) OX=237561 GN=HTB1 PE=3 SV=3	9.67249	0.00200529
P02293	H2B1_YEAST Histone H2B.1 OS=Saccharomyces cerevisiae (strain ATCC 204508 / S288c) OX=559292 GN=HTB1 PE=1 SV=2	9.67249	0.00200529
Q59VP1	H2B2_CANAL Histone H2B.2 OS=Candida albicans (strain SC5314 / ATCC MYA-2876) OX=237561 GN=HTB2 PE=3 SV=3	9.67249	0.00200529
P02294	H2B2_YEAST Histone H2B.2 OS=Saccharomyces cerevisiae (strain ATCC 204508 / S288c) OX=559292 GN=HTB2 PE=1 SV=2	9.67249	0.00200529
P22202	HSP74_YEAST Heat shock protein SSA4 OS=Saccharomyces cerevisiae (strain ATCC 204508 / S288c) OX=559292 GN=SSA4 PE=1 SV=3	9.24454	0.00108745
P09435	HSP73_YEAST Heat shock protein SSA3 OS=Saccharomyces cerevisiae (strain ATCC 204508 / S288c) OX=559292 GN=SSA3 PE=1 SV=3	9.03651	0.00200529
A0A1D8PC97	A0A1D8PC97_CANAL Tubulin beta chain OS=Candida albicans (strain SC5314 / ATCC MYA-2876) OX=237561 GN=TUB2 PE=3 SV=1	8.8086	2.27315e-06
A0A1D8PG96	A0A1D8PG96_CANAL Hsp70 family ATPase OS=Candida albicans (strain SC5314 / ATCC MYA-2876) OX=237561 GN=KAR2 PE=3 SV=1	8.77513	0.00118582
C5M618	C5M618_CANTT Heat shock 70 kDa protein C OS=Candida tropicalis (strain ATCC MYA-3404 / T1) OX=294747 GN=CTRG_01299 PE=3 SV=1	8.77513	0.00118582
C5MC56	C5MC56_CANTT Heat shock protein SSA1 OS=Candida tropicalis (strain ATCC MYA-3404 / T1) OX=294747 GN=CTRG_03648 PE=3 SV=1	8.5671	0.00205875
C5MF85	C5MF85_CANTT Heat shock protein 70 2 OS=Candida tropicalis (strain ATCC MYA-3404 / T1) OX=294747 GN=CTRG_04728 PE=3 SV=1	8.5671	0.00205875
P41797	HSP71_CANAL Heat shock protein SSA1 OS=Candida albicans (strain SC5314 / ATCC MYA-2876) OX=237561 GN=SSA1 PE=1 SV=2	8.5671	0.00205875
P46587	HSP72_CANAL Heat shock protein SSA2 OS=Candida albicans (strain SC5314 / ATCC MYA-2876) OX=237561 GN=SSA2 PE=1 SV=4	8.5671	0.00205875
A0A1D8PFR4	A0A1D8PFR4_CANAL Actin OS=Candida albicans (strain SC5314 / ATCC MYA-2876) OX=237561 GN=ACT1 PE=3 SV=1	4.5025	0.000136944
P60010	ACT_YEAST Actin OS=Saccharomyces cerevisiae (strain ATCC 204508 / S288c) OX=559292 GN=ACT1 PE=1 SV=1	4.5025	0.000136944
C5MC34	C5MC34_CANTT Actin OS=Candida tropicalis (strain ATCC MYA-3404 / T1) OX=294747 GN=CTRG_03626 PE=3 SV=1	4.5025	0.000136944
A0A062X383	A0A062X383_9LACO Glyceraldehyde-3-phosphate dehydrogenase OS=Lactobacillus animalis OX=1605 GN=gap PE=3 SV=1	1.4117	8.36e-05
Q5CRJ4	Q5CRJ4_CRYPI Polyubiquitin with 3 Ub domains (Fragment) OS=Cryptosporidium parvum (strain Iowa II) OX=353152 GN=cgd5_2550 PE=4 SV=1	-2.64307	0.000776446
Q5CYH8	Q5CYH8_CRYPI 60S ribosomal protein L40 (Fragment) OS=Cryptosporidium parvum (strain Iowa II) OX=353152 GN=cgd7_2280 PE=4 SV=1	-2.64307	0.000776446
A3FPW5	A3FPW5_CRYPI Elongation factor 1-alpha OS=Cryptosporidium parvum (strain Iowa II) OX=353152 GN=cgd6_3990 PE=3 SV=1	-5.87632	2.87473e-06

## Sheet: Microbial Prot_Caec-Col-Faeces
Uniprot accession	Description	Combined Log Fold Change	P-value (FDR adjusted)
A0A373ZWP3	A0A373ZWP3_9BACT 30S ribosomal protein S19 OS=Alistipes sp. AF14-19 OX=2292910 GN=rpsS PE=3 SV=1	6.09848	0.000311307
A0A379MPM5	A0A379MPM5_9BACT 30S ribosomal protein S19 OS=Rikenella microfusus OX=28139 GN=rpsS PE=3 SV=1	6.09848	0.000311307
B3C876	B3C876_9BACE 30S ribosomal protein S19 OS=Bacteroides intestinalis DSM 17393 OX=471870 GN=rpsS PE=3 SV=1	6.09848	0.000311307
D5EUS9	D5EUS9_PRER2 30S ribosomal protein S19 OS=Prevotella ruminicola (strain ATCC 19189 / JCM 8958 / 23) OX=264731 GN=rpsS PE=3 SV=1	6.09848	0.000311307
F9ZB10	F9ZB10_ODOSD 30S ribosomal protein S19 OS=Odoribacter splanchnicus (strain ATCC 29572 / DSM 20712 / CIP 104287 / JCM 15291 / NCTC 10825 / 1651/6) OX=709991 GN=rpsS PE=3 SV=1	6.09848	0.000311307
V2PWN1	V2PWN1_9BACT 30S ribosomal protein S19 OS=Mucispirillum schaedleri ASF457 OX=1379858 GN=rpsS PE=3 SV=1	6.09848	0.000311307
W0EPN1	W0EPN1_9BACT 30S ribosomal protein S19 OS=Barnesiella viscericola DSM 18177 OX=880074 GN=rpsS PE=3 SV=1	6.09848	0.000311307
A0A379MMW5	A0A379MMW5_9BACT Elongation factor Tu OS=Rikenella microfusus OX=28139 GN=tufA PE=3 SV=1	4.61554	0.00815952
G5IKX7	G5IKX7_9CLOT Fucose_iso_C domain-containing protein OS=Hungatella hathewayi WAL-18680 OX=742737 GN=HMPREF9473_04155 PE=4 SV=1	3.69685	0.044052
N2AAA5	N2AAA5_9FIRM Flagellin OS=Eubacterium plexicaudatum ASF492 OX=1235802 GN=C823_03559 PE=3 SV=1	2.77179	0.00815952
N2B036	N2B036_9FIRM Flagellin OS=Eubacterium plexicaudatum ASF492 OX=1235802 GN=C823_01316 PE=3 SV=1	2.77179	0.00815952
G9YUI4	G9YUI4_FLAPL Rubredoxin OS=Flavonifractor plautii ATCC 29863 OX=411475 GN=HMPREF0372_03198 PE=4 SV=1	1.56588	0.00898418
A0A0S2W6L7	A0A0S2W6L7_9FIRM Rubrerythrin OS=Intestinimonas butyriciproducens OX=1297617 GN=C7373_105108 PE=4 SV=1	1.55223	0.00948662
A0A3A9E8T7	A0A3A9E8T7_9FIRM Flagellin (Fragment) OS=Ruminococcus sp. 1xD21-23 OX=2320089 GN=D7W80_03815 PE=4 SV=1	1.49633	0.048112
A0A1C7IAG7	A0A1C7IAG7_9FIRM Formate C-acetyltransferase OS=Blautia sp. YL58 OX=1796616 GN=A4V09_09095 PE=4 SV=1	1.43568	0.00815952
A0A2K4ZLH1	A0A2K4ZLH1_9FIRM Formate acetyltransferase OS=Acetatifactor muris OX=879566 GN=pflB_2 PE=4 SV=1	1.19736	0.044052
G2T184	G2T184_ROSHA Phosphoglycerate kinase OS=Roseburia hominis (strain DSM 16839 / NCIMB 14029 / A2-183) OX=585394 GN=pgk PE=3 SV=1	0.957336	0.0154207
A0A2K4ZAP8	A0A2K4ZAP8_9FIRM Flagellin OS=Acetatifactor muris OX=879566 GN=fliC PE=3 SV=1	0.864328	0.0272885
G5IFX1	G5IFX1_9CLOT Peripla_BP_4 domain-containing protein OS=Hungatella hathewayi WAL-18680 OX=742737 GN=HMPREF9473_02399 PE=4 SV=1	0.818576	0.0331963
A0A3A9JJB0	A0A3A9JJB0_9FIRM Flagellin OS=Anaerotruncus sp. 1XD22-93 OX=2320082 GN=D7Y41_01425 PE=3 SV=1	0.662661	0.00919829
A0A1Q9JTF4	A0A1Q9JTF4_9FIRM 60 kDa chaperonin OS=Anaerostipes sp. 494a OX=1261636 GN=groL PE=3 SV=1	0.646113	0.044052
A0A3A9E8R5	A0A3A9E8R5_9FIRM 60 kDa chaperonin OS=Ruminococcus sp. 1xD21-23 OX=2320089 GN=groL PE=3 SV=1	0.646113	0.044052
A0A3A9E9A6	A0A3A9E9A6_9FIRM 10 kDa chaperonin OS=Ruminococcus sp. 1xD21-23 OX=2320089 GN=groS PE=3 SV=1	0.600081	0.0224377
G5IDI8	G5IDI8_9CLOT 10 kDa chaperonin OS=Hungatella hathewayi WAL-18680 OX=742737 GN=groS PE=3 SV=1	0.600081	0.0224377
A0A1C7IBK0	A0A1C7IBK0_9FIRM 50S ribosomal protein L29 OS=Blautia sp. YL58 OX=1796616 GN=rpmC PE=3 SV=1	0.387098	0.044052
A0A3A9J6V5	A0A3A9J6V5_9FIRM 50S ribosomal protein L29 OS=Anaerotruncus sp. 1XD22-93 OX=2320082 GN=rpmC PE=3 SV=1	0.387098	0.044052
C6LH52	C6LH52_9FIRM 50S ribosomal protein L29 OS=Marvinbryantia formatexigens DSM 14469 OX=478749 GN=rpmC PE=3 SV=1	0.387098	0.044052
G2T5M5	G2T5M5_ROSHA 50S ribosomal protein L29 OS=Roseburia hominis (strain DSM 16839 / NCIMB 14029 / A2-183) OX=585394 GN=rpmC PE=3 SV=1	0.387098	0.044052
G5IL64	G5IL64_9CLOT 50S ribosomal protein L29 OS=Hungatella hathewayi WAL-18680 OX=742737 GN=rpmC PE=3 SV=1	0.387098	0.044052
A0A3A9J482	A0A3A9J482_9FIRM GGGtGRT protein OS=Anaerotruncus sp. 1XD22-93 OX=2320082 GN=D7Y41_02210 PE=4 SV=1	-0.439499	0.044052
A0A3A9J7Q1	A0A3A9J7Q1_9FIRM HPr family phosphocarrier protein OS=Anaerotruncus sp. 1XD22-93 OX=2320082 GN=D7Y41_15915 PE=4 SV=1	-0.490564	0.0224377
C6LGJ9	C6LGJ9_9FIRM HPr domain-containing protein OS=Marvinbryantia formatexigens DSM 14469 OX=478749 GN=BRYFOR_07759 PE=4 SV=1	-0.639074	0.0263451
A0A0S2W5A9	A0A0S2W5A9_9FIRM 50S ribosomal protein L7/L12 OS=Intestinimonas butyriciproducens OX=1297617 GN=rplL PE=3 SV=1	-0.642875	0.00482723
G9YMX9	G9YMX9_FLAPL 50S ribosomal protein L7/L12 OS=Flavonifractor plautii ATCC 29863 OX=411475 GN=rplL PE=3 SV=1	-0.642875	0.00482723
C6LGJ2	C6LGJ2_9FIRM Chaperone protein DnaK OS=Marvinbryantia formatexigens DSM 14469 OX=478749 GN=dnaK PE=2 SV=1	-0.683715	0.044052
A0A3A9EAR6	A0A1Q9JQ28_9FIRM Chaperone protein DnaK OS=Anaerostipes sp. 494a OX=1261636 GN=dnaK PE=2 SV=1	-0.777771	0.044052
A0A1Q9JQ28	A0A1Q9JQ28_9FIRM Chaperone protein DnaK OS=Anaerostipes sp. 494a OX=1261636 GN=dnaK PE=2 SV=1	-1.05071	0.044052
G2T1F0	G2T1F0_ROSHA Pyruvate, phosphate dikinase OS=Roseburia hominis (strain DSM 16839 / NCIMB 14029 / A2-183) OX=585394 GN=RHOM_06305 PE=3 SV=1	-1.1889	0.0186712
A5Z9K3	A5Z9K3_9FIRM Glyceraldehyde-3-phosphate dehydrogenase OS=Eubacterium ventriosum ATCC 27560 OX=411463 GN=gap PE=3 SV=1	-1.30555	0.00893534
A0A0S2W049	A0A0S2W049_9FIRM Pyruvate-flavodoxin oxidoreductase OS=Intestinimonas butyriciproducens OX=1297617 GN=IB211_00332c PE=3 SV=1	-1.35796	0.044052
A0A1Y4H8C3	A0A1Y4H8C3_9FIRM Pyruvate:ferredoxin (Flavodoxin) oxidoreductase OS=Anaerofilum sp. An201 OX=1965588 GN=B5F36_05190 PE=3 SV=1	-1.35796	0.044052
A0A3A9I843	A0A3A9I843_9FIRM Pyruvate:ferredoxin (Flavodoxin) oxidoreductase OS=Anaerotruncus sp. 1XD22-93 OX=2320082 GN=nifJ PE=3 SV=1	-1.35796	0.044052
A0A416R0N0	A0A416R0N0_9FIRM Pyruvate:ferredoxin (Flavodoxin) oxidoreductase OS=Pseudoflavonifractor sp. AF19-9AC OX=2292244 GN=nifJ PE=3 SV=1	-1.35796	0.044052
E1QZ00	E1QZ00_OLSUV Pyruvate ferredoxin/flavodoxin oxidoreductase OS=Olsenella uli (strain ATCC 49627 / DSM 7084 / CIP 109912 / JCM 12494 / NCIMB 702895 / VPI D76D-27C) OX=633147 GN=Olsu_0499 PE=3 SV=1	-1.35796	0.044052
G9YPH0	G9YPH0_FLAPL Pyruvate synthase OS=Flavonifractor plautii ATCC 29863 OX=411475 GN=HMPREF0372_01448 PE=4 SV=1	-1.35796	0.044052
J4KAW6	J4KAW6_9FIRM Elongation factor G OS=Lachnoanaerobaculum sp. ICM7 OX=936594 GN=fusA PE=3 SV=1	-1.36349	0.00948662
A0A3A9DRF5	A0A3A9DRF5_9FIRM Pyruvate:ferredoxin (Flavodoxin) oxidoreductase (Fragment) OS=Ruminococcus sp. 1xD21-23 OX=2320089 GN=nifJ PE=4 SV=1	-1.40902	0.044052
A0A4S2FSJ4	A0A4S2FSJ4_9ACTN Pyruvate:ferredoxin (Flavodoxin) oxidoreductase OS=Enterorhabdus sp. NM05_H27 OX=2516956 GN=nifJ PE=3 SV=1	-1.40902	0.044052
N2ACX8	N2ACX8_9FIRM Uncharacterized protein OS=Eubacterium plexicaudatum ASF492 OX=1235802 GN=C823_03280 PE=4 SV=1	-1.64779	0.0116658
A0A3A9E8E3	A0A3A9E8E3_9FIRM Elongation factor Tu OS=Ruminococcus sp. 1xD21-23 OX=2320089 GN=tuf PE=3 SV=1	-1.66503	0.0330595
A0A379MQX7	A0A379MQX7_9BACT Pyruvate synthase subunit porA OS=Rikenella microfusus OX=28139 GN=porA_1 PE=3 SV=1	-1.85126	0.0201763
A0A1Q9JUB6	A0A1Q9JUB6_9FIRM ATP synthase subunit beta OS=Anaerostipes sp. 494a OX=1261636 GN=atpD PE=3 SV=1	-1.85325	0.044052
A0A1C7I6D2	A0A1C7I6D2_9FIRM Acetyl-CoA synthase subunit delta OS=Blautia sp. YL58 OX=1796616 GN=A4V09_05465 PE=4 SV=1	-2.56879	0.00771723
A0A3A9J8Z9	A0A3A9J8Z9_9FIRM 60 kDa chaperonin OS=Anaerotruncus sp. 1XD22-93 OX=2320082 GN=groL PE=3 SV=1	-3.1673	0.0449371
W0EUV9	W0EUV9_9BACT Fructose-bisphosphate aldolase OS=Barnesiella viscericola DSM 18177 OX=880074 GN=BARVI_09105 PE=4 SV=1	-3.278	0.0221598
A0A2K4ZCP3	A0A2K4ZCP3_9FIRM 50S ribosomal protein L2 OS=Acetatifactor muris OX=879566 GN=rplB PE=3 SV=1	-3.42356	0.044052
A0A0S2W8F7	A0A0S2W8F7_9FIRM Pyruvate, phosphate dikinase OS=Intestinimonas butyriciproducens OX=1297617 GN=IB211_03246c PE=3 SV=1	-3.57042	0.044052
G4L1Y8	G4L1Y8_OSCVS Pyruvate, phosphate dikinase OS=Oscillibacter valericigenes (strain DSM 18026 / NBRC 101213 / Sjm18-20) OX=693746 GN=ppdK PE=3 SV=1	-3.57042	0.044052
G9YRT8	G9YRT8_FLAPL Pyruvate, phosphate dikinase OS=Flavonifractor plautii ATCC 29863 OX=411475 GN=HMPREF0372_02240 PE=3 SV=1	-3.57042	0.044052
A0A3A9J6N6	A0A3A9J6N6_9FIRM Elongation factor Tu OS=Anaerotruncus sp. 1XD22-93 OX=2320082 GN=tuf PE=3 SV=1	-3.75832	0.000746353
C6LCL0	C6LCL0_9FIRM CO dehydrogenase/CO-methylating acetyl-CoA synthase complex, beta subunit OS=Marvinbryantia formatexigens DSM 14469 OX=478749 GN=cdhC PE=4 SV=1	-3.83006	0.030831
J5H2W7	J5H2W7_9FIRM Pyruvate synthase OS=Lachnoanaerobaculum sp. ICM7 OX=936594 GN=nifJ PE=3 SV=1	-3.84028	0.0461258
V2PX91	V2PX91_9BACT Uncharacterized protein OS=Mucispirillum schaedleri ASF457 OX=1379858 GN=N508_01734 PE=4 SV=1	-3.85384	0.0263373
V2QIK1	V2QIK1_9BACT Elongation factor Tu OS=Mucispirillum schaedleri ASF457 OX=1379858 GN=tuf PE=3 SV=1	-3.85956	0.0140905
A0A1C7I9E7	A0A1C7I9E7_9FIRM Pyruvate:ferredoxin (Flavodoxin) oxidoreductase OS=Blautia sp. YL58 OX=1796616 GN=A4V09_03140 PE=3 SV=1	-3.97343	0.0457899
G5IGZ3	G5IGZ3_9CLOT Uncharacterized protein OS=Hungatella hathewayi WAL-18680 OX=742737 GN=HMPREF9473_02771 PE=4 SV=1	-3.97448	0.044052
A0A1Q9JU72	A0A1Q9JU72_9FIRM Pyruvate:ferredoxin (Flavodoxin) oxidoreductase OS=Anaerostipes sp. 494a OX=1261636 GN=BHF70_08690 PE=3 SV=1	-3.98504	0.040569
C6LE54	C6LE54_9FIRM Pyruvate synthase OS=Marvinbryantia formatexigens DSM 14469 OX=478749 GN=nifJ PE=3 SV=1	-3.98504	0.040569
A0A3A9IZ39	A0A3A9IZ39_9FIRM CO dehydrogenase/CO-methylating acetyl-CoA synthase complex subunit beta OS=Anaerotruncus sp. 1XD22-93 OX=2320082 GN=cdhC PE=4 SV=1	-3.99238	0.0360101
A0A1C7I6K8	A0A1C7I6K8_9FIRM CO dehydrogenase/CO-methylating acetyl-CoA synthase complex subunit beta OS=Blautia sp. YL58 OX=1796616 GN=A4V09_05460 PE=4 SV=1	-4.04674	0.0333343
G2T2I8	G2T2I8_ROSHA HPr domain-containing protein OS=Roseburia hominis (strain DSM 16839 / NCIMB 14029 / A2-183) OX=585394 GN=RHOM_05460 PE=4 SV=1	-4.0622	0.044052
J4TGE1	J4TGE1_9FIRM PTS HPr component phosphorylation site OS=Lachnoanaerobaculum sp. ICM7 OX=936594 GN=HMPREF1140_1533 PE=4 SV=1	-4.0622	0.044052
N2BDR8	N2BDR8_9FIRM HPr domain-containing protein OS=Eubacterium plexicaudatum ASF492 OX=1235802 GN=C823_00838 PE=4 SV=1	-4.0622	0.044052
A0A1Y4HD85	A0A1Y4HD85_9FIRM Uncharacterized protein OS=Anaerofilum sp. An201 OX=1965588 GN=B5F36_01275 PE=4 SV=1	-4.12612	0.0261782
A0A3A9IJL5	A0A3A9IJL5_9FIRM Uncharacterized protein OS=Anaerotruncus sp. 1XD22-93 OX=2320082 GN=D7Y41_16895 PE=4 SV=1	-4.12612	0.0261782
B2UNK0	B2UNK0_AKKM8 Uncharacterized protein OS=Akkermansia muciniphila (strain ATCC BAA-835 / Muc) OX=349741 GN=Amuc_1902 PE=4 SV=1	-4.12612	0.0261782
B3CHC4	B3CHC4_9BACE Uncharacterized protein OS=Bacteroides intestinalis DSM 17393 OX=471870 GN=BACINT_02966 PE=4 SV=1	-4.12612	0.0261782
E1QYS5	E1QYS5_OLSUV NifU-like domain-containing protein OS=Olsenella uli (strain ATCC 49627 / DSM 7084 / CIP 109912 / JCM 12494 / NCIMB 702895 / VPI D76D-27C) OX=633147 GN=Olsu_0415 PE=4 SV=1	-4.12612	0.0261782
A5Z9I9	A5Z9I9_9FIRM Electron transfer flavoprotein domain protein OS=Eubacterium ventriosum ATCC 27560 OX=411463 GN=EUBVEN_02385 PE=4 SV=1	-4.14698	0.0224377
A5Z9K4	A5Z9K4_9FIRM Phosphoglycerate kinase OS=Eubacterium ventriosum ATCC 27560 OX=411463 GN=pgk PE=3 SV=1	-4.31452	0.0224377
G5IL92	G5IL92_9CLOT Elongation factor G OS=Hungatella hathewayi WAL-18680 OX=742737 GN=fusA PE=3 SV=1	-4.32007	0.048112
C6LMP6	C6LMP6_9FIRM Uncharacterized protein OS=Marvinbryantia formatexigens DSM 14469 OX=478749 GN=BRYFOR_09947 PE=4 SV=1	-4.43453	0.0363345
A0A1Q9JR63	A0A1Q9JR63_9FIRM Electron transfer flavoprotein subunit beta OS=Anaerostipes sp. 494a OX=1261636 GN=BHF70_03175 PE=4 SV=1	-4.51196	0.0116658
A0A1Y4HEM1	A0A1Y4HEM1_9FIRM Elongation factor Tu OS=Anaerofilum sp. An201 OX=1965588 GN=tuf PE=3 SV=1	-4.55276	0.0415413
G2T034	G2T034_ROSHA Electron transfer flavoprotein beta-subunit (Beta-ETF) (Electrontransfer flavoprotein small subunit) (ETFSS) OS=Roseburia hominis (strain DSM 16839 / NCIMB 14029 / A2-183) OX=585394 GN=RHOM_02780 PE=4 SV=1	-4.68903	0.0240424
A0A3A9ECV7	A0A3A9ECV7_9FIRM 50S ribosomal protein L11 OS=Ruminococcus sp. 1xD21-23 OX=2320089 GN=rplK PE=3 SV=1	-4.71298	0.000311307
G2SZ78	G2SZ78_ROSHA 50S ribosomal protein L11 OS=Roseburia hominis (strain DSM 16839 / NCIMB 14029 / A2-183) OX=585394 GN=rplK PE=3 SV=1	-4.71298	0.000311307
G9YMY3	G9YMY3_FLAPL 50S ribosomal protein L11 OS=Flavonifractor plautii ATCC 29863 OX=411475 GN=rplK PE=3 SV=1	-4.71298	0.000311307
N2B5S8	N2B5S8_9FIRM 50S ribosomal protein L11 OS=Eubacterium plexicaudatum ASF492 OX=1235802 GN=rplK PE=3 SV=1	-4.71298	0.000311307
A5Z6Y2	A5Z6Y2_9FIRM ABC transporter, ATP-binding protein OS=Eubacterium ventriosum ATCC 27560 OX=411463 GN=EUBVEN_01465 PE=3 SV=1	-4.81089	0.0289907
N2AHN6	N2AHN6_9FIRM Maltose/maltodextrin transport system ATP-binding protein OS=Eubacterium plexicaudatum ASF492 OX=1235802 GN=C823_02771 PE=3 SV=1	-4.81089	0.0289907
A0A416RFL2	A0A416RFL2_9FIRM Elongation factor Tu OS=Pseudoflavonifractor sp. AF19-9AC OX=2292244 GN=tuf PE=3 SV=1	-4.84249	0.0224377
N2A8L2	N2A8L2_9FIRM Fructose-1,6-bisphosphate aldolase, class II OS=Eubacterium plexicaudatum ASF492 OX=1235802 GN=C823_03226 PE=4 SV=1	-4.84889	0.044052
A0A2K4ZAK7	A0A2K4ZAK7_9FIRM Trehalose import ATP-binding protein SugC OS=Acetatifactor muris OX=879566 GN=sugC_1 PE=3 SV=1	-5.00776	0.023424
G9YXJ9	G9YXJ9_FLAPL Elongation factor Tu OS=Flavonifractor plautii ATCC 29863 OX=411475 GN=tuf PE=3 SV=1	-5.00793	0.0224377
A0A1C7IET2	A0A1C7IET2_9FIRM ABC transporter ATP-binding protein OS=Blautia sp. YL58 OX=1796616 GN=A4V09_21895 PE=3 SV=1	-5.01219	0.0224377
C4IDD1	C4IDD1_CLOBU Multiple sugar-binding transport ATP-binding protein MsmK OS=Clostridium butyricum E4 str. BoNT E BL5262 OX=632245 GN=CLP_3360 PE=3 SV=1	-5.01219	0.0224377
D4W431	D4W431_9FIRM ABC transporter, ATP-binding protein OS=Turicibacter sanguinis PC909 OX=702450 GN=CUW_2219 PE=3 SV=1	-5.01219	0.0224377
G2SXD5	G2SXD5_ROSHA ABC-type sugar/spermidine/putrescine/iron/thiamine transport system, ATPase component OS=Roseburia hominis (strain DSM 16839 / NCIMB 14029 / A2-183) OX=585394 GN=RHOM_09690 PE=3 SV=1	-5.01219	0.0224377
G4KRE7	G4KRE7_OSCVS Putative sugar ABC transporter ATP-binding protein OS=Oscillibacter valericigenes (strain DSM 18026 / NBRC 101213 / Sjm18-20) OX=693746 GN=OBV_02190 PE=3 SV=1	-5.01219	0.0224377
J4K882	J4K882_9FIRM ABC transporter, ATP-binding protein OS=Lachnoanaerobaculum sp. ICM7 OX=936594 GN=HMPREF1140_0850 PE=3 SV=1	-5.01219	0.0224377
Q837A5	Q837A5_ENTFA ABC transporter, ATP-binding/TOBE domain protein OS=Enterococcus faecalis (strain ATCC 700802 / V583) OX=226185 GN=EF_0938 PE=3 SV=1	-5.01219	0.0224377
Q8G6G8	Q8G6G8_BIFLO ATP binding protein of ABC transporter for sugars OS=Bifidobacterium longum (strain NCC 2705) OX=206672 GN=msiK PE=3 SV=1	-5.01219	0.0224377
C4IK85	C4IK85_CLOBU NifU_N domain-containing protein OS=Clostridium butyricum E4 str. BoNT E BL5262 OX=632245 GN=CLP_1268 PE=4 SV=1	-5.26622	0.00764125
D5EYJ7	D5EYJ7_PRER2 Uncharacterized protein OS=Prevotella ruminicola (strain ATCC 19189 / JCM 8958 / 23) OX=264731 GN=PRU_0686 PE=4 SV=1	-5.26622	0.00764125
F9Z6D8	F9Z6D8_ODOSD Uncharacterized protein OS=Odoribacter splanchnicus (strain ATCC 29572 / DSM 20712 / CIP 104287 / JCM 15291 / NCTC 10825 / 1651/6) OX=709991 GN=Odosp_2926 PE=4 SV=1	-5.26622	0.00764125
K5XYA2	K5XYA2_9BACT Uncharacterized protein OS=Parabacteroides johnsonii CL02T12C29 OX=999419 GN=HMPREF1077_03698 PE=4 SV=1	-5.26622	0.00764125
W0ET29	W0ET29_9BACT Nitrogen-fixing protein NifU OS=Barnesiella viscericola DSM 18177 OX=880074 GN=BARVI_05650 PE=4 SV=1	-5.26622	0.00764125
G4KS62	G4KS62_OSCVS NifU_N domain-containing protein OS=Oscillibacter valericigenes (strain DSM 18026 / NBRC 101213 / Sjm18-20) OX=693746 GN=OBV_03240 PE=4 SV=1	-5.33376	0.00893534
G2SWI9	G2SWI9_ROSHA Uncharacterized protein OS=Roseburia hominis (strain DSM 16839 / NCIMB 14029 / A2-183) OX=585394 GN=RHOM_05770 PE=4 SV=1	-5.57334	0.00125127
G2T1R6	G2T1R6_ROSHA Formate acetyltransferase OS=Roseburia hominis (strain DSM 16839 / NCIMB 14029 / A2-183) OX=585394 GN=RHOM_02190 PE=4 SV=1	-5.58408	0.0240424
A0A099UDK3	A0A099UDK3_9HELI Elongation factor Tu OS=Helicobacter apodemus OX=135569 GN=tuf PE=3 SV=1	-6.41089	0.00919829
A0A416R6M1	A0A416R6M1_9FIRM Glyceraldehyde-3-phosphate dehydrogenase OS=Pseudoflavonifractor sp. AF19-9AC OX=2292244 GN=gap PE=3 SV=1	-6.81628	0.01365
A0A3A9J091	A0A3A9J091_9FIRM sn-glycerol-3-phosphate ABC transporter ATP-binding protein UgpC OS=Anaerotruncus sp. 1XD22-93 OX=2320082 GN=ugpC PE=3 SV=1	-6.97731	0.000311307
C6LLK6	C6LLK6_9FIRM ABC transporter, ATP-binding protein OS=Marvinbryantia formatexigens DSM 14469 OX=478749 GN=BRYFOR_09554 PE=3 SV=1	-6.97731	0.000311307
A0A3A9IS89	A0A3A9IS89_9FIRM Pyruvate:ferredoxin (Flavodoxin) oxidoreductase OS=Anaerotruncus sp. 1XD22-93 OX=2320082 GN=nifJ PE=3 SV=1	-7.19479	3.52022e-05
G2T3L1	G2T3L1_ROSHA NifU_N domain-containing protein OS=Roseburia hominis (strain DSM 16839 / NCIMB 14029 / A2-183) OX=585394 GN=RHOM_08560 PE=4 SV=1	-8.58171	7.14775e-15
N1ZYI7	N1ZYI7_9FIRM NifU_N domain-containing protein OS=Eubacterium plexicaudatum ASF492 OX=1235802 GN=C823_04185 PE=4 SV=1	-8.58171	7.14775e-15
A0A0S2W5R3	A0A0S2W5R3_9FIRM Elongation factor G OS=Intestinimonas butyriciproducens OX=1297617 GN=fusA PE=3 SV=1	-9.19029	9.37429e-10
A0A1Y4H9P7	A0A1Y4H800_9FIRM ATP synthase subunit beta OS=Anaerofilum sp. An201 OX=1965588 GN=atpD PE=3 SV=1	-9.19029	9.37429e-10
A0A3A9JLN5	A0A3A9JLN5_9FIRM Elongation factor G OS=Anaerotruncus sp. 1XD22-93 OX=2320082 GN=fusA PE=3 SV=1	-9.19029	9.37429e-10
F9ZB16	F9ZB16_ODOSD Elongation factor G OS=Odoribacter splanchnicus (strain ATCC 29572 / DSM 20712 / CIP 104287 / JCM 15291 / NCTC 10825 / 1651/6) OX=709991 GN=fusA PE=3 SV=1	-9.19029	9.37429e-10
G4KVR1	G4KVR1_OSCVS Elongation factor G OS=Oscillibacter valericigenes (strain DSM 18026 / NBRC 101213 / Sjm18-20) OX=693746 GN=fusA PE=3 SV=1	-9.19029	9.37429e-10
K5Y929	K5Y929_9BACT Elongation factor G OS=Parabacteroides johnsonii CL02T12C29 OX=999419 GN=fusA PE=3 SV=1	-9.19029	9.37429e-10
