# Supplementary material for: Cryptosporidiosis Modulates the Gut Microbiome Metabolism and Immune Response in an Infected Host
Source: Preprints.org preprint supplement (doi:10.20944/preprints202104.0528.v1), 2021-04-20
Supplement: Supplementary file 2 [file SD2_Cryptosporidiosis host response_Intestine.xlsx]

## Sheet: Host response proteins
Uniprot accession	Description	Combined Log Fold Change	P-value (FDR adjusted)
E9Q2D1	Actin, cytoplasmic 1 (Fragment) OS=Mus musculus OX=10090 GN=Actb PE=1 SV=1	7.25956	1.31164e-16
E9Q606	Actin, cytoplasmic 1 (Fragment) OS=Mus musculus OX=10090 GN=Actb PE=1 SV=1	6.16595	3.30045e-09
P68134	Actin, alpha skeletal muscle OS=Mus musculus OX=10090 GN=Acta1 PE=1 SV=1	5.37347	5.05818e-09
G3UZ07	Actin, cytoplasmic 2 (Fragment) OS=Mus musculus OX=10090 GN=Actg1 PE=1 SV=1	5.24367	1.88476e-07
E9Q5F4	Actin, cytoplasmic 1 (Fragment) OS=Mus musculus OX=10090 GN=Actb PE=1 SV=1	4.39196	4.40736e-08
P02535	Keratin, type I cytoskeletal 10 OS=Mus musculus OX=10090 GN=Krt10 PE=1 SV=3	3.70267	9.17063e-06
A2A513	Keratin, type I cytoskeletal 10 OS=Mus musculus OX=10090 GN=Krt10 PE=1 SV=1	3.70267	9.17063e-06
P48962	ADP/ATP translocase 1 OS=Mus musculus OX=10090 GN=Slc25a4 PE=1 SV=4	3.58624	1.7005e-10
A0A0U1RNK9	Electron transfer flavoprotein subunit beta (Fragment) OS=Mus musculus OX=10090 GN=Etfb PE=1 SV=2	2.62925	0.0035882
Q9DCW4	Electron transfer flavoprotein subunit beta OS=Mus musculus OX=10090 GN=Etfb PE=1 SV=3	2.48523	0.00122039
P11352	Glutathione peroxidase 1 OS=Mus musculus OX=10090 GN=Gpx1 PE=1 SV=2	2.37504	0.000134796
Q06890	Clusterin OS=Mus musculus OX=10090 GN=Clu PE=1 SV=1	2.34866	0.000187089
P63260	Actin, cytoplasmic 2 OS=Mus musculus OX=10090 GN=Actg1 PE=1 SV=1	2.32946	7.47192e-07
P60710	Actin, cytoplasmic 1 OS=Mus musculus OX=10090 GN=Actb PE=1 SV=1	2.32946	7.47192e-07
D3Z5E2	Heat shock cognate 71 kDa protein (Fragment) OS=Mus musculus OX=10090 GN=Hspa8 PE=1 SV=1	2.32461	0.00026679
A0A1D5RM20	Actin, alpha skeletal muscle (Fragment) OS=Mus musculus OX=10090 GN=Acta1 PE=3 SV=1	2.29843	0.0118084
P43276	Histone H1.5 OS=Mus musculus OX=10090 GN=Hist1h1b PE=1 SV=2	2.26745	0.000596794
A0A140LJ61	Synemin OS=Mus musculus OX=10090 GN=Synm PE=1 SV=1	2.20949	0.00839753
Q9ET01	Glycogen phosphorylase, liver form OS=Mus musculus OX=10090 GN=Pygl PE=1 SV=4	2.07823	0.00122039
Q3UEJ6	Alpha-1,4 glucan phosphorylase OS=Mus musculus OX=10090 GN=Pygl PE=1 SV=1	2.07823	0.00122039
P31786	Acyl-CoA-binding protein OS=Mus musculus OX=10090 GN=Dbi PE=1 SV=2	2.07795	0.000579647
Q4VWZ5	Acyl-CoA-binding protein OS=Mus musculus OX=10090 GN=Dbi PE=1 SV=1	2.07795	0.000579647
P09411	Phosphoglycerate kinase 1 OS=Mus musculus OX=10090 GN=Pgk1 PE=1 SV=4	2.07461	0.0281524
E9Q1F2	Actin, cytoplasmic 1 OS=Mus musculus OX=10090 GN=Actb PE=1 SV=1	2.06225	5.46068e-06
B1ATY1	Actin, cytoplasmic 2 OS=Mus musculus OX=10090 GN=Actg1 PE=1 SV=1	1.98144	7.10736e-06
Q5SV64	Myosin-10 OS=Mus musculus OX=10090 GN=Myh10 PE=1 SV=1	1.97777	7.53719e-06
Q61879	Myosin-10 OS=Mus musculus OX=10090 GN=Myh10 PE=1 SV=2	1.97777	7.53719e-06
Q3UH59	Myosin-10 OS=Mus musculus OX=10090 GN=Myh10 PE=1 SV=1	1.97777	7.53719e-06
A0A140LJ79	Synemin OS=Mus musculus OX=10090 GN=Synm PE=1 SV=1	1.94726	0.0149798
Q70IV5	Synemin OS=Mus musculus OX=10090 GN=Synm PE=1 SV=2	1.93361	0.0210488
Q3UEG7	Inter-alpha-trypsin inhibitor heavy chain H2 (Fragment) OS=Mus musculus OX=10090 GN=Itih2 PE=1 SV=1	1.9289	0.00463897
F7DCW4	Polypyrimidine tract-binding protein 1 (Fragment) OS=Mus musculus OX=10090 GN=Ptbp1 PE=1 SV=1	1.88554	0.000402906
O88569	Heterogeneous nuclear ribonucleoproteins A2/B1 OS=Mus musculus OX=10090 GN=Hnrnpa2b1 PE=1 SV=2	1.82956	0.000765042
Q8BGD9	Eukaryotic translation initiation factor 4B OS=Mus musculus OX=10090 GN=Eif4b PE=1 SV=1	1.8002	0.000330307
Q9QVP4	Myosin regulatory light chain 2, atrial isoform OS=Mus musculus OX=10090 GN=Myl7 PE=1 SV=1	1.77981	0.000187089
P62960	Nuclease-sensitive element-binding protein 1 OS=Mus musculus OX=10090 GN=Ybx1 PE=1 SV=3	1.70313	1.68618e-05
Q01853	Transitional endoplasmic reticulum ATPase OS=Mus musculus OX=10090 GN=Vcp PE=1 SV=4	1.70064	0.00170639
Q8BG05	Heterogeneous nuclear ribonucleoprotein A3 OS=Mus musculus OX=10090 GN=Hnrnpa3 PE=1 SV=1	1.70041	0.0190737
A2AL12	Heterogeneous nuclear ribonucleoprotein A3 OS=Mus musculus OX=10090 GN=Hnrnpa3 PE=1 SV=1	1.70041	0.0190737
B2RXM2	EG627828 protein OS=Mus musculus OX=10090 GN=Gm6793 PE=1 SV=1	1.70041	0.0190737
A0A0U1RNJ1	Fatty acid synthase OS=Mus musculus OX=10090 GN=Fasn PE=1 SV=1	1.69788	0.00082548
Q4KL80	Fibronectin OS=Mus musculus OX=10090 GN=Fn1 PE=1 SV=1	1.69644	0.000115459
Q9D312	Keratin, type I cytoskeletal 20 OS=Mus musculus OX=10090 GN=Krt20 PE=1 SV=1	1.69058	0.000115459
D3YZ68	Elongation factor 1-alpha 1 (Fragment) OS=Mus musculus OX=10090 GN=Eef1a1 PE=1 SV=1	1.68912	0.00195004
P19096	Fatty acid synthase OS=Mus musculus OX=10090 GN=Fasn PE=1 SV=2	1.68407	0.000885659
D3Z3I8	Elongation factor 1-alpha 1 (Fragment) OS=Mus musculus OX=10090 GN=Eef1a1 PE=1 SV=1	1.68351	0.00117708
Q8BND5	Sulfhydryl oxidase 1 OS=Mus musculus OX=10090 GN=Qsox1 PE=1 SV=1	1.65772	0.00313759
P30416	Peptidyl-prolyl cis-trans isomerase FKBP4 OS=Mus musculus OX=10090 GN=Fkbp4 PE=1 SV=5	1.64013	4.59371e-05
Q99LC5	Electron transfer flavoprotein subunit alpha, mitochondrial OS=Mus musculus OX=10090 GN=Etfa PE=1 SV=2	1.62666	0.00887281
P10126	Elongation factor 1-alpha 1 OS=Mus musculus OX=10090 GN=Eef1a1 PE=1 SV=3	1.61013	0.00445723
S4R257	Glyceraldehyde-3-phosphate dehydrogenase (Fragment) OS=Mus musculus OX=10090 GN=Gapdh PE=1 SV=1	1.57678	0.00955758
P17156	Heat shock-related 70 kDa protein 2 OS=Mus musculus OX=10090 GN=Hspa2 PE=1 SV=2	1.56273	0.00356479
P97351	40S ribosomal protein S3a OS=Mus musculus OX=10090 GN=Rps3a PE=1 SV=3	1.55659	0.00486302
Q9D3D9	ATP synthase subunit delta, mitochondrial OS=Mus musculus OX=10090 GN=Atp5f1d PE=1 SV=1	1.52397	0.032863
P62874	Guanine nucleotide-binding protein G(I)/G(S)/G(T) subunit beta-1 OS=Mus musculus OX=10090 GN=Gnb1 PE=1 SV=3	1.5233	1.31273e-05
Q64433	10 kDa heat shock protein, mitochondrial OS=Mus musculus OX=10090 GN=Hspe1 PE=1 SV=2	1.5171	0.0232237
Q3UV95	Erythrocyte membrane protein band 4.2 OS=Mus musculus OX=10090 GN=Epb42 PE=1 SV=1	1.51206	0.001336
Q8CGP4	Histone H2A OS=Mus musculus OX=10090 GN=Hist1h2aa PE=1 SV=1	1.50011	0.0386509
Q9D855	Cytochrome b-c1 complex subunit 7 OS=Mus musculus OX=10090 GN=Uqcrb PE=1 SV=3	1.4987	0.0109913
Q9CQB4	Cytochrome b-c1 complex subunit 7 OS=Mus musculus OX=10090 GN=Uqcrb PE=1 SV=1	1.4987	0.0109913
Q8R1M2	Histone H2A.J OS=Mus musculus OX=10090 GN=H2afj PE=1 SV=1	1.49134	0.0388662
Q8CGP6	Histone H2A type 1-H OS=Mus musculus OX=10090 GN=Hist1h2ah PE=1 SV=3	1.49134	0.0388662
Q8CGP7	Histone H2A type 1-K OS=Mus musculus OX=10090 GN=Hist1h2ak PE=1 SV=3	1.49134	0.0388662
C0HKE4	Histone H2A type 1-E OS=Mus musculus OX=10090 GN=Hist1h2ae PE=1 SV=1	1.49134	0.0388662
Q8BFU2	Histone H2A type 3 OS=Mus musculus OX=10090 GN=Hist3h2a PE=1 SV=3	1.49134	0.0388662
Q8CGP5	Histone H2A type 1-F OS=Mus musculus OX=10090 GN=Hist1h2af PE=1 SV=3	1.49134	0.0388662
A0A0N4SV66	Histone H2A OS=Mus musculus OX=10090 GN=H2afj PE=1 SV=1	1.49134	0.0388662
A0A0J9YUQ8	Gelsolin (Fragment) OS=Mus musculus OX=10090 GN=Gsn PE=1 SV=1	1.47879	0.0388618
P20918	Plasminogen OS=Mus musculus OX=10090 GN=Plg PE=1 SV=3	1.47172	0.00670124
D3Z2F2	60 kDa heat shock protein, mitochondrial (Fragment) OS=Mus musculus OX=10090 GN=Hspd1 PE=1 SV=1	1.46956	0.0384919
D3Z7J9	60 kDa heat shock protein, mitochondrial (Fragment) OS=Mus musculus OX=10090 GN=Hspd1 PE=1 SV=1	1.45516	0.0388662
Q8QZR3	Pyrethroid hydrolase Ces2a OS=Mus musculus OX=10090 GN=Ces2a PE=1 SV=1	1.39558	0.0148814
B2M1R6	Heterogeneous nuclear ribonucleoprotein K OS=Mus musculus OX=10090 GN=Hnrnpk PE=1 SV=1	1.37506	0.00955758
Q9D6J6	NADH dehydrogenase [ubiquinone] flavoprotein 2, mitochondrial OS=Mus musculus OX=10090 GN=Ndufv2 PE=1 SV=2	1.35431	0.00658029
F7B227	Delta(3,5)-Delta(2,4)-dienoyl-CoA isomerase, mitochondrial (Fragment) OS=Mus musculus OX=10090 GN=Ech1 PE=1 SV=1	1.34102	0.0044038
H3BKR2	Guanine nucleotide-binding protein G(I)/G(S)/G(T) subunit beta-1 (Fragment) OS=Mus musculus OX=10090 GN=Gnb1 PE=1 SV=8	1.3126	0.00278222
A0A0U1RQB4	Electron transfer flavoprotein subunit beta (Fragment) OS=Mus musculus OX=10090 GN=Etfb PE=1 SV=1	1.25006	0.0281524
O35459	Delta(3,5)-Delta(2,4)-dienoyl-CoA isomerase, mitochondrial OS=Mus musculus OX=10090 GN=Ech1 PE=1 SV=1	1.21894	0.00915315
A0A0N4SUX5	Gamma-enolase OS=Mus musculus OX=10090 GN=Eno2 PE=1 SV=1	1.21706	0.0251452
P17183	Gamma-enolase OS=Mus musculus OX=10090 GN=Eno2 PE=1 SV=2	1.21706	0.0251452
D3Z6E4	Gamma-enolase OS=Mus musculus OX=10090 GN=Eno2 PE=1 SV=1	1.21706	0.0251452
Q61937	Nucleophosmin OS=Mus musculus OX=10090 GN=Npm1 PE=1 SV=1	1.18086	0.00574929
Q5SQB0	Nucleophosmin OS=Mus musculus OX=10090 GN=Npm1 PE=1 SV=1	1.18086	0.00574929
F6XC15	Filamin-A (Fragment) OS=Mus musculus OX=10090 GN=Flna PE=1 SV=1	1.1732	0.0350706
P61979	Heterogeneous nuclear ribonucleoprotein K OS=Mus musculus OX=10090 GN=Hnrnpk PE=1 SV=1	1.16132	0.0232324
P38647	Stress-70 protein, mitochondrial OS=Mus musculus OX=10090 GN=Hspa9 PE=1 SV=3	1.08849	0.00740559
Q8QZT1	Acetyl-CoA acetyltransferase, mitochondrial OS=Mus musculus OX=10090 GN=Acat1 PE=1 SV=1	1.0827	0.0388662
Q61425	Hydroxyacyl-coenzyme A dehydrogenase, mitochondrial OS=Mus musculus OX=10090 GN=Hadh PE=1 SV=2	1.08038	0.00658029
O08691	Arginase-2, mitochondrial OS=Mus musculus OX=10090 GN=Arg2 PE=1 SV=1	1.05777	0.0292914
B0R0F0	Creatine kinase U-type, mitochondrial (Fragment) OS=Mus musculus OX=10090 GN=Ckmt1 PE=1 SV=1	0.999589	0.00164676
P63017	Heat shock cognate 71 kDa protein OS=Mus musculus OX=10090 GN=Hspa8 PE=1 SV=1	0.985699	0.0490348
K3W4Q8	Basigin OS=Mus musculus OX=10090 GN=Bsg PE=1 SV=1	0.980142	0.0498046
P18572	Basigin OS=Mus musculus OX=10090 GN=Bsg PE=1 SV=2	0.980142	0.0498046
J3QP71	Basigin (Fragment) OS=Mus musculus OX=10090 GN=Bsg PE=1 SV=1	0.980142	0.0498046
Q504P4	Heat shock cognate 71 kDa protein OS=Mus musculus OX=10090 GN=Hspa8 PE=1 SV=1	0.977145	0.0488566
A0A140LI60	Myosin-14 (Fragment) OS=Mus musculus OX=10090 GN=Myh14 PE=1 SV=1	0.9568	0.00492209
P17225	Polypyrimidine tract-binding protein 1 OS=Mus musculus OX=10090 GN=Ptbp1 PE=1 SV=2	0.890103	0.0485359
B0R0E9	Creatine kinase U-type, mitochondrial (Fragment) OS=Mus musculus OX=10090 GN=Ckmt1 PE=1 SV=1	0.868833	0.0100319
Q6P069	Sorcin OS=Mus musculus OX=10090 GN=Sri PE=1 SV=1	0.838662	0.0261477
F8WID5	Tropomyosin alpha-1 chain OS=Mus musculus OX=10090 GN=Tpm1 PE=1 SV=1	0.803029	0.0450562
P48678	Prelamin-A/C OS=Mus musculus OX=10090 GN=Lmna PE=1 SV=2	0.794781	0.0130498
Q99JY9	Actin-related protein 3 OS=Mus musculus OX=10090 GN=Actr3 PE=1 SV=3	0.789858	0.0472326
Q6URW6	Myosin-14 OS=Mus musculus OX=10090 GN=Myh14 PE=1 SV=1	0.78677	0.0483068
K3W4R2	Myosin-14 OS=Mus musculus OX=10090 GN=Myh14 PE=1 SV=1	0.78677	0.0483068
A2ARP5	Creatine kinase U-type, mitochondrial (Fragment) OS=Mus musculus OX=10090 GN=Ckmt1 PE=1 SV=1	0.764624	0.0384409
Q8VIJ6	Splicing factor, proline- and glutamine-rich OS=Mus musculus OX=10090 GN=Sfpq PE=1 SV=1	0.740179	0.0439653
P31001	Desmin OS=Mus musculus OX=10090 GN=Des PE=1 SV=3	0.736923	0.0190737
P48036	Annexin A5 OS=Mus musculus OX=10090 GN=Anxa5 PE=1 SV=1	0.645553	0.0485359
Q62468	Villin-1 OS=Mus musculus OX=10090 GN=Vil1 PE=1 SV=3	0.644573	0.0407645
P07309	Transthyretin OS=Mus musculus OX=10090 GN=Ttr PE=1 SV=1	-0.645757	0.0437371
A0A0A0MQG2	Spectrin beta chain, non-erythrocytic 1 (Fragment) OS=Mus musculus OX=10090 GN=Sptbn1 PE=1 SV=1	-0.659403	0.0282928
E9Q616	AHNAK nucleoprotein (desmoyokin) OS=Mus musculus OX=10090 GN=Ahnak PE=1 SV=1	-0.660323	0.0232237
Q62261	Spectrin beta chain, non-erythrocytic 1 OS=Mus musculus OX=10090 GN=Sptbn1 PE=1 SV=2	-0.682712	0.0251452
O88844	Isocitrate dehydrogenase [NADP] cytoplasmic OS=Mus musculus OX=10090 GN=Idh1 PE=1 SV=2	-0.732888	0.00285145
Q9QUI0	Transforming protein RhoA OS=Mus musculus OX=10090 GN=Rhoa PE=1 SV=1	-0.753682	0.0232877
Q9CPY7	Cytosol aminopeptidase OS=Mus musculus OX=10090 GN=Lap3 PE=1 SV=3	-0.755758	0.0260371
D3YVY3	Isocitrate dehydrogenase [NADP] cytoplasmic (Fragment) OS=Mus musculus OX=10090 GN=Idh1 PE=1 SV=1	-0.805809	0.030442
A0A087WRS9	Isocitrate dehydrogenase [NADP] cytoplasmic (Fragment) OS=Mus musculus OX=10090 GN=Idh1 PE=1 SV=1	-0.816176	0.0111487
A0A087WPT4	Isocitrate dehydrogenase [NADP] cytoplasmic (Fragment) OS=Mus musculus OX=10090 GN=Idh1 PE=1 SV=1	-0.816176	0.0111487
Q61838	Pregnancy zone protein OS=Mus musculus OX=10090 GN=Pzp PE=1 SV=3	-0.831898	0.0338012
P24549	Retinal dehydrogenase 1 OS=Mus musculus OX=10090 GN=Aldh1a1 PE=1 SV=5	-0.840269	0.0258207
P63330	Serine/threonine-protein phosphatase 2A catalytic subunit alpha isoform OS=Mus musculus OX=10090 GN=Ppp2ca PE=1 SV=1	-0.847888	0.00880164
A0A0N4SW89	Annexin (Fragment) OS=Mus musculus OX=10090 GN=Anxa4 PE=1 SV=3	-0.866585	0.0490348
A0A087WRM4	Isocitrate dehydrogenase [NADP] cytoplasmic (Fragment) OS=Mus musculus OX=10090 GN=Idh1 PE=1 SV=1	-0.888974	0.0238291
Q91X72	Hemopexin OS=Mus musculus OX=10090 GN=Hpx PE=1 SV=2	-0.891722	0.00258928
A0A0N4SV57	Annexin (Fragment) OS=Mus musculus OX=10090 GN=Anxa4 PE=1 SV=1	-0.893951	0.0469534
Q64442	Sorbitol dehydrogenase OS=Mus musculus OX=10090 GN=Sord PE=1 SV=3	-0.897119	0.00382879
D3Z6I7	Caldesmon 1 OS=Mus musculus OX=10090 GN=Cald1 PE=1 SV=1	-0.904351	0.0215536
P01027	Complement C3 OS=Mus musculus OX=10090 GN=C3 PE=1 SV=3	-0.911695	0.0251452
S4R1T7	Caldesmon 1 OS=Mus musculus OX=10090 GN=Cald1 PE=1 SV=1	-0.915065	0.0190737
E9Q0M9	Caldesmon 1 OS=Mus musculus OX=10090 GN=Cald1 PE=1 SV=1	-0.915065	0.0190737
D3Z0S1	Annexin (Fragment) OS=Mus musculus OX=10090 GN=Anxa4 PE=1 SV=1	-0.925464	0.024153
F7CFA5	Glutamate dehydrogenase 1, mitochondrial (Fragment) OS=Mus musculus OX=10090 GN=Glud1 PE=1 SV=1	-0.940601	0.0242681
F8VQM0	Alkaline phosphatase OS=Mus musculus OX=10090 GN=Akp3 PE=1 SV=1	-0.967338	0.0386509
P24822	Intestinal-type alkaline phosphatase OS=Mus musculus OX=10090 GN=Iap PE=2 SV=1	-0.967338	0.0386509
P37040	NADPH--cytochrome P450 reductase OS=Mus musculus OX=10090 GN=Por PE=1 SV=2	-0.9702	0.0372167
P57780	Alpha-actinin-4 OS=Mus musculus OX=10090 GN=Actn4 PE=1 SV=1	-0.97093	0.0234291
P97429	Annexin A4 OS=Mus musculus OX=10090 GN=Anxa4 PE=1 SV=4	-0.971217	0.0279531
A0A1L1SV25	Alpha-actinin-4 OS=Mus musculus OX=10090 GN=Actn4 PE=1 SV=1	-0.973249	0.0232237
Q9D8N0	Elongation factor 1-gamma OS=Mus musculus OX=10090 GN=Eef1g PE=1 SV=3	-0.982994	0.0408921
D3YYR8	Transferrin (Fragment) OS=Mus musculus OX=10090 GN=Trf PE=1 SV=1	-1.00272	0.00955758
O88312	Anterior gradient protein 2 homolog OS=Mus musculus OX=10090 GN=Agr2 PE=1 SV=1	-1.05396	0.0369486
Q60932	Voltage-dependent anion-selective channel protein 1 OS=Mus musculus OX=10090 GN=Vdac1 PE=1 SV=3	-1.08797	0.00632182
P16110	Galectin-3 OS=Mus musculus OX=10090 GN=Lgals3 PE=1 SV=3	-1.11782	0.0152506
Q8C253	Galectin OS=Mus musculus OX=10090 GN=Lgals3 PE=1 SV=1	-1.11782	0.0152506
A0A0R4IZW5	Cadherin 1, isoform CRA_b OS=Mus musculus OX=10090 GN=Cdh1 PE=1 SV=1	-1.14425	0.00955758
P09803	Cadherin-1 OS=Mus musculus OX=10090 GN=Cdh1 PE=1 SV=1	-1.14425	0.00955758
P06745	Glucose-6-phosphate isomerase OS=Mus musculus OX=10090 GN=Gpi PE=1 SV=4	-1.15643	0.0490348
Q9CPU0	Lactoylglutathione lyase OS=Mus musculus OX=10090 GN=Glo1 PE=1 SV=3	-1.16509	0.0190737
B2KF29	Colipase OS=Mus musculus OX=10090 GN=Clps PE=1 SV=1	-1.17274	0.0184913
Q9R100	Cadherin-17 OS=Mus musculus OX=10090 GN=Cdh17 PE=1 SV=1	-1.18141	0.043524
D3Z223	Phosphoglycerate mutase (Fragment) OS=Mus musculus OX=10090 GN=Bpgm PE=1 SV=1	-1.19129	0.0288393
P14869	60S acidic ribosomal protein P0 OS=Mus musculus OX=10090 GN=Rplp0 PE=1 SV=3	-1.2089	0.0250632
F2Z471	Voltage-dependent anion-selective channel protein 1 OS=Mus musculus OX=10090 GN=Vdac1 PE=1 SV=1	-1.21139	0.000765042
O08677	Kininogen-1 OS=Mus musculus OX=10090 GN=Kng1 PE=1 SV=1	-1.21584	0.00312712
D3YTY9	Kininogen-1 OS=Mus musculus OX=10090 GN=Kng1 PE=1 SV=1	-1.21584	0.00312712
A0A0R4J038	Kininogen-1 OS=Mus musculus OX=10090 GN=Kng1 PE=1 SV=1	-1.21584	0.00312712
A0A0A6YXF6	Transforming protein RhoA (Fragment) OS=Mus musculus OX=10090 GN=Rhoa PE=1 SV=1	-1.21949	0.00955758
P38060	Hydroxymethylglutaryl-CoA lyase, mitochondrial OS=Mus musculus OX=10090 GN=Hmgcl PE=1 SV=2	-1.25573	0.00425305
Q9CXN7	Phenazine biosynthesis-like domain-containing protein 2 OS=Mus musculus OX=10090 GN=Pbld2 PE=1 SV=1	-1.26123	0.00583767
Q9CQ52	Chymotrypsin-like elastase family member 3B OS=Mus musculus OX=10090 GN=Cela3b PE=1 SV=1	-1.27968	0.000428891
E9PV85	Amylase 2a1 (Fragment) OS=Mus musculus OX=10090 GN=Amy2a1 PE=1 SV=1	-1.29017	0.0469534
Q922D8	C-1-tetrahydrofolate synthase, cytoplasmic OS=Mus musculus OX=10090 GN=Mthfd1 PE=1 SV=4	-1.29374	0.0142541
E9Q3X0	Major vault protein OS=Mus musculus OX=10090 GN=Mvp PE=1 SV=1	-1.30399	0.00955758
Q9EQK5	Major vault protein OS=Mus musculus OX=10090 GN=Mvp PE=1 SV=4	-1.30399	0.00955758
Q60997	Deleted in malignant brain tumors 1 protein OS=Mus musculus OX=10090 GN=Dmbt1 PE=1 SV=2	-1.3146	0.0260371
E9QPG8	Deleted in malignant brain tumors 1 protein OS=Mus musculus OX=10090 GN=Dmbt1 PE=1 SV=1	-1.3146	0.0260371
A0A140LI59	Deleted in malignant brain tumors 1 protein OS=Mus musculus OX=10090 GN=Dmbt1 PE=1 SV=1	-1.3146	0.0260371
P62983	Ubiquitin-40S ribosomal protein S27a OS=Mus musculus OX=10090 GN=Rps27a PE=1 SV=2	-1.32263	0.0111487
A0A1D5RM72	Deleted in malignant brain tumors 1 protein OS=Mus musculus OX=10090 GN=Dmbt1 PE=1 SV=1	-1.33792	0.0238291
Q9D7Z6	Calcium-activated chloride channel regulator 1 OS=Mus musculus OX=10090 GN=Clca1 PE=1 SV=2	-1.34583	0.00180616
F7ALS6	Aspartate aminotransferase, cytoplasmic (Fragment) OS=Mus musculus OX=10090 GN=Got1 PE=1 SV=1	-1.34625	0.00846898
Q9R111	Guanine deaminase OS=Mus musculus OX=10090 GN=Gda PE=1 SV=1	-1.34952	0.00457887
O70570	Polymeric immunoglobulin receptor OS=Mus musculus OX=10090 GN=Pigr PE=1 SV=1	-1.34955	0.000192275
A0A0A6YXW6	Immunoglobulin heavy constant alpha (Fragment) OS=Mus musculus OX=10090 GN=Igha PE=1 SV=1	-1.35075	0.00812463
A0A075B6A3	Immunoglobulin heavy constant alpha (Fragment) OS=Mus musculus OX=10090 GN=Igha PE=1 SV=1	-1.35075	0.00812463
Q9CZ19	Myosin light chain 4 OS=Mus musculus OX=10090 GN=Myl4 PE=1 SV=1	-1.35587	0.0111487
A2A6Q8	Myosin light chain 4 (Fragment) OS=Mus musculus OX=10090 GN=Myl4 PE=1 SV=8	-1.35587	0.0111487
P09541	Myosin light chain 4 OS=Mus musculus OX=10090 GN=Myl4 PE=1 SV=3	-1.35587	0.0111487
F8VPT3	Lactase OS=Mus musculus OX=10090 GN=Lct PE=1 SV=1	-1.35617	0.0232237
P17182	Alpha-enolase OS=Mus musculus OX=10090 GN=Eno1 PE=1 SV=3	-1.35788	0.0023588
E9Q9C6	Fc fragment of IgG-binding protein OS=Mus musculus OX=10090 GN=Fcgbp PE=1 SV=1	-1.359	0.00941185
E9Q0B5	Fc fragment of IgG-binding protein OS=Mus musculus OX=10090 GN=Fcgbp PE=1 SV=1	-1.35936	0.00958213
P03958	Adenosine deaminase OS=Mus musculus OX=10090 GN=Ada PE=1 SV=3	-1.36043	0.0431356
A0A0A0MQA3	Alpha-1-antitrypsin 1-1 OS=Mus musculus OX=10090 GN=Serpina1a PE=1 SV=1	-1.36192	0.0476424
P07758	Alpha-1-antitrypsin 1-1 OS=Mus musculus OX=10090 GN=Serpina1a PE=1 SV=4	-1.36192	0.0476424
E9Q9J0	Ubiquitin-60S ribosomal protein L40 (Fragment) OS=Mus musculus OX=10090 GN=Uba52 PE=4 SV=1	-1.36386	0.00915315
P0CG49	Polyubiquitin-B OS=Mus musculus OX=10090 GN=Ubb PE=2 SV=1	-1.36386	0.00915315
E9Q5F6	Polyubiquitin-C (Fragment) OS=Mus musculus OX=10090 GN=Ubc PE=1 SV=1	-1.36386	0.00915315
A0A0A6YW67	MCG23377, isoform CRA_b OS=Mus musculus OX=10090 GN=Gm8797 PE=4 SV=1	-1.36386	0.00915315
E9Q4P0	KxDL motif-containing protein 1 (Fragment) OS=Mus musculus OX=10090 GN=Kxd1 PE=1 SV=1	-1.36386	0.00915315
P0CG50	Polyubiquitin-C OS=Mus musculus OX=10090 GN=Ubc PE=1 SV=2	-1.36386	0.00915315
Q5SX22	Polyubiquitin-B (Fragment) OS=Mus musculus OX=10090 GN=Ubb PE=4 SV=2	-1.36386	0.00915315
P26040	Ezrin OS=Mus musculus OX=10090 GN=Ezr PE=1 SV=3	-1.36842	0.00445723
O54724	Caveolae-associated protein 1 OS=Mus musculus OX=10090 GN=Cavin1 PE=1 SV=1	-1.37885	0.0123598
Q923D2	Flavin reductase (NADPH) OS=Mus musculus OX=10090 GN=Blvrb PE=1 SV=3	-1.38894	0.0129849
P05208	Chymotrypsin-like elastase family member 2A OS=Mus musculus OX=10090 GN=Cela2a PE=1 SV=1	-1.39164	0.0255663
G5E924	Heterogeneous nuclear ribonucleoprotein L (Fragment) OS=Mus musculus OX=10090 GN=Hnrnpl PE=1 SV=1	-1.4238	0.00705898
Q8R081	Heterogeneous nuclear ribonucleoprotein L OS=Mus musculus OX=10090 GN=Hnrnpl PE=1 SV=2	-1.4238	0.00705898
Q91WG0	Acylcarnitine hydrolase OS=Mus musculus OX=10090 GN=Ces2c PE=1 SV=1	-1.4393	0.0237162
D6RFU9	Synaptophysin-like protein OS=Mus musculus OX=10090 GN=Sypl PE=1 SV=1	-1.44303	0.00173822
O55042	Alpha-synuclein OS=Mus musculus OX=10090 GN=Snca PE=1 SV=2	-1.44683	0.0108622
Q921I1	Serotransferrin OS=Mus musculus OX=10090 GN=Tf PE=1 SV=1	-1.44953	1.62997e-06
P07724	Serum albumin OS=Mus musculus OX=10090 GN=Alb PE=1 SV=3	-1.46368	0.000648807
Q9WTP7	GTP:AMP phosphotransferase AK3, mitochondrial OS=Mus musculus OX=10090 GN=Ak3 PE=1 SV=3	-1.4663	0.00955758
E9Q035	Predicted gene 20425 OS=Mus musculus OX=10090 GN=Gm20425 PE=4 SV=1	-1.47417	9.50481e-07
A0A2R8VHL3	Chymotrypsin-like elastase family member 1 OS=Mus musculus OX=10090 GN=Cela1 PE=1 SV=1	-1.48439	0.0189713
A0A0R4J0B9	Glycoprotein 2 (Zymogen granule membrane), isoform CRA_b OS=Mus musculus OX=10090 GN=Gp2 PE=1 SV=1	-1.52035	0.029206
A0A140LHP0	Pancreatic secretory granule membrane major glycoprotein GP2 OS=Mus musculus OX=10090 GN=Gp2 PE=1 SV=1	-1.52035	0.029206
Q9D733	Pancreatic secretory granule membrane major glycoprotein GP2 OS=Mus musculus OX=10090 GN=Gp2 PE=1 SV=3	-1.52035	0.029206
O09117	Synaptophysin-like protein 1 OS=Mus musculus OX=10090 GN=Sypl1 PE=1 SV=2	-1.52814	0.000885659
Q8BK48	Pyrethroid hydrolase Ces2e OS=Mus musculus OX=10090 GN=Ces2e PE=1 SV=1	-1.54621	0.0118084
Q6PHC1	Alpha-enolase OS=Mus musculus OX=10090 GN=Eno1 PE=1 SV=1	-1.55378	0.00233385
P00756	Kallikrein 1-related peptidase b3 OS=Mus musculus OX=10090 GN=Klk1b3 PE=1 SV=1	-1.57603	0.00742329
P47738	Aldehyde dehydrogenase, mitochondrial OS=Mus musculus OX=10090 GN=Aldh2 PE=1 SV=1	-1.57718	0.0238291
A0A1B0GRD3	Cadherin-related family member 5 (Fragment) OS=Mus musculus OX=10090 GN=Cdhr5 PE=1 SV=1	-1.57907	0.003762
A0A1B0GSY5	Cadherin-related family member 5 (Fragment) OS=Mus musculus OX=10090 GN=Cdhr5 PE=1 SV=1	-1.57907	0.003762
B5THE2	Maltase-glucoamylase OS=Mus musculus OX=10090 GN=Mgam PE=1 SV=1	-1.58266	0.000581652
Q9JHI5	Isovaleryl-CoA dehydrogenase, mitochondrial OS=Mus musculus OX=10090 GN=Ivd PE=1 SV=1	-1.58491	1.39641e-05
Q60930	Voltage-dependent anion-selective channel protein 2 OS=Mus musculus OX=10090 GN=Vdac2 PE=1 SV=2	-1.58701	0.00955758
G3UX26	Voltage-dependent anion-selective channel protein 2 OS=Mus musculus OX=10090 GN=Vdac2 PE=1 SV=1	-1.58701	0.00955758
Q9ESB3	Histidine-rich glycoprotein OS=Mus musculus OX=10090 GN=Hrg PE=1 SV=2	-1.59161	0.0143151
A0A0R4J039	Histidine-rich glycoprotein OS=Mus musculus OX=10090 GN=Hrg PE=1 SV=1	-1.59161	0.0143151
D3YUI3	Pregnancy zone protein (Fragment) OS=Mus musculus OX=10090 GN=Pzp PE=1 SV=1	-1.59576	0.039211
F6YY69	14-3-3 protein theta (Fragment) OS=Mus musculus OX=10090 GN=Ywhaq PE=1 SV=1	-1.61666	0.0382906
P68254	14-3-3 protein theta OS=Mus musculus OX=10090 GN=Ywhaq PE=1 SV=1	-1.61666	0.0382906
F6VW30	14-3-3 protein theta (Fragment) OS=Mus musculus OX=10090 GN=Ywhaq PE=1 SV=1	-1.61666	0.0382906
E9PZC3	Flavin reductase (NADPH) OS=Mus musculus OX=10090 GN=Blvrb PE=1 SV=1	-1.63146	0.00092923
B2RS76	Carboxypeptidase B1 (Tissue), isoform CRA_b OS=Mus musculus OX=10090 GN=Cpb1 PE=1 SV=1	-1.64268	0.0074771
A0PJK7	Cadherin-related family member 5 OS=Mus musculus OX=10090 GN=Cdhr5 PE=1 SV=1	-1.6493	0.000667383
Q8VHF2	Cadherin-related family member 5 OS=Mus musculus OX=10090 GN=Cdhr5 PE=1 SV=1	-1.6493	0.000667383
P15626	Glutathione S-transferase Mu 2 OS=Mus musculus OX=10090 GN=Gstm2 PE=1 SV=2	-1.64972	0.00026679
D3YX76	Glutathione S-transferase OS=Mus musculus OX=10090 GN=Gstm2 PE=1 SV=1	-1.64972	0.00026679
Q8R3G9	Tetraspanin-8 OS=Mus musculus OX=10090 GN=Tspan8 PE=1 SV=1	-1.65822	0.00208764
Q11136	Xaa-Pro dipeptidase OS=Mus musculus OX=10090 GN=Pepd PE=1 SV=3	-1.68843	0.0002539
Q02053	Ubiquitin-like modifier-activating enzyme 1 OS=Mus musculus OX=10090 GN=Uba1 PE=1 SV=1	-1.69863	0.003762
P17563	Methanethiol oxidase OS=Mus musculus OX=10090 GN=Selenbp1 PE=1 SV=2	-1.70151	0.000287362
A0A0J9YVE6	Maltase-glucoamylase OS=Mus musculus OX=10090 GN=Mgam PE=1 SV=1	-1.72745	0.00050376
P70412	CUB and zona pellucida-like domain-containing protein 1 OS=Mus musculus OX=10090 GN=Cuzd1 PE=1 SV=2	-1.72863	0.00955758
D3YUE8	Phosphoglycerate mutase (Fragment) OS=Mus musculus OX=10090 GN=Bpgm PE=1 SV=1	-1.73086	0.0238291
B2RU69	CUB and zona pellucida-like domain-containing protein 1 OS=Mus musculus OX=10090 GN=Cuzd1 PE=1 SV=1	-1.75697	0.00915315
P14824	Annexin A6 OS=Mus musculus OX=10090 GN=Anxa6 PE=1 SV=3	-1.76122	5.17224e-06
F8WIT2	Annexin OS=Mus musculus OX=10090 GN=Anxa6 PE=1 SV=1	-1.76122	5.17224e-06
A0A0U1RPN5	Kallikrein-1 (Fragment) OS=Mus musculus OX=10090 GN=Klk1 PE=1 SV=1	-1.775	0.00478231
F7CJN9	Transferrin (Fragment) OS=Mus musculus OX=10090 GN=Trf PE=4 SV=1	-1.83842	1.07029e-08
O35490	Betaine--homocysteine S-methyltransferase 1 OS=Mus musculus OX=10090 GN=Bhmt PE=1 SV=1	-1.8396	0.000579647
F7BAE9	Transferrin (Fragment) OS=Mus musculus OX=10090 GN=Trf PE=1 SV=1	-1.85178	9.75398e-08
P07146	Anionic trypsin-2 OS=Mus musculus OX=10090 GN=Prss2 PE=1 SV=1	-1.88389	0.0016006
F8VQM5	Sucrase isomaltase (alpha-glucosidase) OS=Mus musculus OX=10090 GN=Sis PE=1 SV=1	-1.88457	8.30439e-06
P23953	Carboxylesterase 1C OS=Mus musculus OX=10090 GN=Ces1c PE=1 SV=4	-1.8847	1.69359e-07
Q91V76	Ester hydrolase C11orf54 homolog OS=Mus musculus OX=10090 PE=1 SV=1	-1.92935	3.34229e-08
P28843	Dipeptidyl peptidase 4 OS=Mus musculus OX=10090 GN=Dpp4 PE=1 SV=3	-1.93739	0.000235835
Q60692	Proteasome subunit beta type-6 OS=Mus musculus OX=10090 GN=Psmb6 PE=1 SV=3	-1.95403	0.000332363
P05201	Aspartate aminotransferase, cytoplasmic OS=Mus musculus OX=10090 GN=Got1 PE=1 SV=3	-1.9942	4.07899e-05
B0QZL1	Alpha-enolase (Fragment) OS=Mus musculus OX=10090 GN=Eno1 PE=1 SV=1	-1.9947	0.000187089
P15947	Kallikrein-1 OS=Mus musculus OX=10090 GN=Klk1 PE=1 SV=3	-1.99607	0.00096631
P01878	Ig alpha chain C region OS=Mus musculus OX=10090 PE=1 SV=1	-2.03479	8.97428e-05
B1ARR7	Alpha-enolase (Fragment) OS=Mus musculus OX=10090 GN=Eno1 PE=1 SV=1	-2.05914	0.000134796
A0A0A0MQ68	Glutaryl-CoA dehydrogenase, mitochondrial OS=Mus musculus OX=10090 GN=Gcdh PE=1 SV=1	-2.06508	0.000182759
Q60759	Glutaryl-CoA dehydrogenase, mitochondrial OS=Mus musculus OX=10090 GN=Gcdh PE=1 SV=2	-2.06508	0.000182759
P35505	Fumarylacetoacetase OS=Mus musculus OX=10090 GN=Fah PE=1 SV=2	-2.09168	0.00116545
D6RHN2	Methanethiol oxidase OS=Mus musculus OX=10090 GN=Selenbp1 PE=1 SV=1	-2.15289	6.61972e-05
A0A1L1SSF8	RIKEN cDNA 4931406C07 gene OS=Mus musculus OX=10090 GN=4931406C07Rik PE=1 SV=1	-2.16112	1.53033e-08
E9Q5Z6	Alcohol dehydrogenase 6A (class V) OS=Mus musculus OX=10090 GN=Adh6a PE=1 SV=1	-2.16524	0.00050376
E9Q4Y1	Alcohol dehydrogenase 6A (class V) OS=Mus musculus OX=10090 GN=Adh6a PE=1 SV=1	-2.16524	0.00050376
Q8C6G3	Ribonuclease pancreatic OS=Mus musculus OX=10090 GN=Rnase1 PE=1 SV=1	-2.21867	0.0144139
P00683	Ribonuclease pancreatic OS=Mus musculus OX=10090 GN=Rnase1 PE=1 SV=2	-2.21867	0.0144139
A0A0G2JEU1	Aldehyde dehydrogenase, mitochondrial OS=Mus musculus OX=10090 GN=Aldh2 PE=1 SV=1	-2.24158	0.00233385
D3YU09	Guanine deaminase OS=Mus musculus OX=10090 GN=Gda PE=1 SV=1	-2.24268	0.000434351
P60335	Poly(rC)-binding protein 1 OS=Mus musculus OX=10090 GN=Pcbp1 PE=1 SV=1	-2.25281	0.00800922
A2A9U8	Chymotrypsin-like elastase family, member 3A OS=Mus musculus OX=10090 GN=Cela3a PE=3 SV=1	-2.25315	2.71296e-05
P50446	Keratin, type II cytoskeletal 6A OS=Mus musculus OX=10090 GN=Krt6a PE=1 SV=3	-2.28215	0.00362774
P09470	Angiotensin-converting enzyme OS=Mus musculus OX=10090 GN=Ace PE=1 SV=3	-2.34341	0.000187089
Q00519	Xanthine dehydrogenase/oxidase OS=Mus musculus OX=10090 GN=Xdh PE=1 SV=5	-2.40271	5.17224e-06
Q6XK23	Maltase-glucoamylase (Fragment) OS=Mus musculus OX=10090 GN=Mgam PE=1 SV=1	-2.47972	0.000605001
Q504N0	Carboxypeptidase A2 OS=Mus musculus OX=10090 GN=Cpa2 PE=1 SV=1	-2.49021	0.000425226
Q61598	Rab GDP dissociation inhibitor beta OS=Mus musculus OX=10090 GN=Gdi2 PE=1 SV=1	-2.51426	0.000270873
Q792Y8	MCG15081 OS=Mus musculus OX=10090 GN=Gm10334 PE=3 SV=1	-2.51457	8.66767e-07
Q792Z0	Protease, serine 3 OS=Mus musculus OX=10090 GN=Prss3 PE=1 SV=1	-2.51457	8.66767e-07
P25688	Uricase OS=Mus musculus OX=10090 GN=Uox PE=1 SV=2	-2.63339	7.61736e-07
A0A087WQS0	Tensin 1 OS=Mus musculus OX=10090 GN=Tns1 PE=1 SV=1	-2.67186	0.000115459
E9Q0S6	Tensin 1 OS=Mus musculus OX=10090 GN=Tns1 PE=1 SV=1	-2.67186	0.000115459
A0A1D5RM59	Tensin 1 OS=Mus musculus OX=10090 GN=Tns1 PE=1 SV=1	-2.67186	0.000115459
A0A087WQM0	Tensin 1 OS=Mus musculus OX=10090 GN=Tns1 PE=1 SV=1	-2.67186	0.000115459
A0A087WRU0	Tensin 1 (Fragment) OS=Mus musculus OX=10090 GN=Tns1 PE=1 SV=1	-2.67186	0.000115459
A0A087WQ94	Tensin 1 (Fragment) OS=Mus musculus OX=10090 GN=Tns1 PE=1 SV=1	-2.67186	0.000115459
A0A0U1RQ96	Actin, gamma-enteric smooth muscle (Fragment) OS=Mus musculus OX=10090 GN=Actg2 PE=3 SV=1	-2.7385	0.000345965
Q7M758	N-acetylated-alpha-linked acidic dipeptidase-like protein OS=Mus musculus OX=10090 GN=Naaladl1 PE=2 SV=1	-2.81183	6.88371e-06
A0A0G2JG44	Uricase (Fragment) OS=Mus musculus OX=10090 GN=Uox PE=1 SV=1	-2.88325	5.39268e-06
Q8K0E8	Fibrinogen beta chain OS=Mus musculus OX=10090 GN=Fgb PE=1 SV=1	-3.11416	0.00026679
P63268	Actin, gamma-enteric smooth muscle OS=Mus musculus OX=10090 GN=Actg2 PE=1 SV=1	-3.20068	2.88708e-07
Q8C6C9	Protein LEG1 homolog OS=Mus musculus OX=10090 GN=Leg1 PE=2 SV=2	-3.24019	6.18608e-06
Q9R1P0	Proteasome subunit alpha type-4 OS=Mus musculus OX=10090 GN=Psma4 PE=1 SV=1	-3.2754	6.88371e-06
F8VPQ6	Alkaline phosphatase OS=Mus musculus OX=10090 GN=Alpi PE=1 SV=1	-3.31438	7.98167e-09
Q9D154	Leukocyte elastase inhibitor A OS=Mus musculus OX=10090 GN=Serpinb1a PE=1 SV=1	-3.31541	1.28804e-09
Q792Z1	MCG140784 OS=Mus musculus OX=10090 GN=Try10 PE=1 SV=1	-3.43293	2.7863e-08
Q9DBT9	Dimethylglycine dehydrogenase, mitochondrial OS=Mus musculus OX=10090 GN=Dmgdh PE=1 SV=1	-3.50774	8.66767e-07
Q9JHE3	Neutral ceramidase OS=Mus musculus OX=10090 GN=Asah2 PE=1 SV=1	-3.71629	7.54719e-08
D3Z2K3	Actin, gamma-enteric smooth muscle (Fragment) OS=Mus musculus OX=10090 GN=Actg2 PE=1 SV=1	-3.98144	1.69359e-07
D3YZY0	Actin, gamma-enteric smooth muscle (Fragment) OS=Mus musculus OX=10090 GN=Actg2 PE=1 SV=2	-4.08316	9.01387e-08
P32261	Antithrombin-III OS=Mus musculus OX=10090 GN=Serpinc1 PE=1 SV=1	-4.23516	3.677e-10
A0A0A6YWH7	Antithrombin-III (Fragment) OS=Mus musculus OX=10090 GN=Serpinc1 PE=1 SV=1	-4.59031	3.677e-10
