# Supplementary material for: Cryptosporidiosis Modulates the Gut Microbiome Metabolism and Immune Response in an Infected Host
Source: Preprints.org preprint supplement (doi:10.20944/preprints202104.0528.v1), 2021-04-20
Supplement: Supplementary file 3 [file SD3_Cryptosporidiosis host response_Serum-Liver.xlsx]

## Sheet: Host response prot_Liver_Serum
Uniprot accession	Description	CombinedLogFC	P -value (FDR adjusted)
E9Q223	Hemoglobin, beta adult s chain (Fragment) OS=Mus musculus OX=10090 GN=Hbb-bs PE=1 SV=1	10.636	2.97005e-11
Q9CQ52	Chymotrypsin-like elastase family member 3B OS=Mus musculus OX=10090 GN=Cela3b PE=1 SV=1	4.94612	0.000100522
A0A0A6YWP4	Complement factor H (Fragment) OS=Mus musculus OX=10090 GN=Cfh PE=1 SV=1	3.97668	0.000829273
A0A2K6EDJ7	Inter alpha-trypsin inhibitor, heavy chain 4 OS=Mus musculus OX=10090 GN=Itih4 PE=1 SV=1	3.91614	0.00591227
Q8VCU2	Glycosylphosphatidylinositol specific phospholipase D1 OS=Mus musculus OX=10090 GN=Gpld1 PE=1 SV=1	3.90781	1.09499e-05
O70362	Phosphatidylinositol-glycan-specific phospholipase D OS=Mus musculus OX=10090 GN=Gpld1 PE=1 SV=1	3.90781	1.09499e-05
A0A0A6YXS8	Antithrombin-III OS=Mus musculus OX=10090 GN=Serpinc1 PE=1 SV=1	3.70906	0.000773471
A0A0A6YX49	Antithrombin-III OS=Mus musculus OX=10090 GN=Serpinc1 PE=1 SV=1	3.70906	0.000773471
Q9DBD0	Inhibitor of carbonic anhydrase OS=Mus musculus OX=10090 GN=Ica PE=1 SV=1	3.67249	0.00665364
D3YY36	RIKEN cDNA 1300017J02 gene OS=Mus musculus OX=10090 GN=1300017J02Rik PE=1 SV=1	3.67249	0.00665364
A6X935	Inter alpha-trypsin inhibitor, heavy chain 4 OS=Mus musculus OX=10090 GN=Itih4 PE=1 SV=2	3.6516	0.0133446
E9PVD2	Inter alpha-trypsin inhibitor, heavy chain 4 OS=Mus musculus OX=10090 GN=Itih4 PE=1 SV=1	3.6516	0.0133446
E9Q5L2	Inter alpha-trypsin inhibitor, heavy chain 4 OS=Mus musculus OX=10090 GN=Itih4 PE=1 SV=1	3.6516	0.0133446
E9Q8Y5	Clusterin (Fragment) OS=Mus musculus OX=10090 GN=Clu PE=1 SV=1	3.53807	0.000218334
E9PXG5	Clusterin (Fragment) OS=Mus musculus OX=10090 GN=Clu PE=1 SV=1	3.53807	0.000218334
E9PUU2	Clusterin (Fragment) OS=Mus musculus OX=10090 GN=Clu PE=1 SV=1	3.53807	0.000218334
H3BK95	Complement factor B (Fragment) OS=Mus musculus OX=10090 GN=Cfb PE=4 SV=1	3.51339	0.000506363
B0R0E9	Creatine kinase U-type, mitochondrial (Fragment) OS=Mus musculus OX=10090 GN=Ckmt1 PE=1 SV=1	3.27363	0.0110577
B0R0E8	Creatine kinase U-type, mitochondrial (Fragment) OS=Mus musculus OX=10090 GN=Ckmt1 PE=1 SV=1	3.27363	0.0110577
F6W2T4	Complement factor B (Fragment) OS=Mus musculus OX=10090 GN=Cfb PE=3 SV=1	3.21934	0.000611916
B8JJM3	Complement factor B (Fragment) OS=Mus musculus OX=10090 GN=Cfb PE=3 SV=1	3.21934	0.000611916
H3BLB8	Paraoxonase 1, isoform CRA_c OS=Mus musculus OX=10090 GN=Pon1 PE=1 SV=1	3.18019	0.0198996
G3X8Q5	Ceruloplasmin OS=Mus musculus OX=10090 GN=Cp PE=1 SV=1	3.11136	0.0101666
G3X9T8	Ceruloplasmin OS=Mus musculus OX=10090 GN=Cp PE=1 SV=1	3.11136	0.0101666
E9Q9B8	Clusterin (Fragment) OS=Mus musculus OX=10090 GN=Clu PE=1 SV=1	3.03846	0.00987262
P08226	Apolipoprotein E OS=Mus musculus OX=10090 GN=Apoe PE=1 SV=2	3.03685	0.0113313
A2ARP5	Creatine kinase U-type, mitochondrial (Fragment) OS=Mus musculus OX=10090 GN=Ckmt1 PE=1 SV=1	2.99502	0.00406353
Q5ND35	Alpha-2-antiplasmin (Fragment) OS=Mus musculus OX=10090 GN=Serpinf2 PE=1 SV=1	2.97696	0.0042654
Q06890	Clusterin OS=Mus musculus OX=10090 GN=Clu PE=1 SV=1	2.93089	0.0010869
A0A0N4SVU1	Predicted gene 7298 OS=Mus musculus OX=10090 GN=Gm7298 PE=4 SV=1	2.89732	0.00400094
A0A1B0GX15	Apolipoprotein E (Fragment) OS=Mus musculus OX=10090 GN=Apoe PE=1 SV=1	2.89261	0.0133446
G3UWN5	Apolipoprotein E (Fragment) OS=Mus musculus OX=10090 GN=Apoe PE=1 SV=1	2.89261	0.0133446
P01029	Complement C4-B OS=Mus musculus OX=10090 GN=C4b PE=1 SV=3	2.87056	0.0181367
G3X977	Inter-alpha trypsin inhibitor, heavy chain 2 OS=Mus musculus OX=10090 GN=Itih2 PE=1 SV=1	2.8278	0.0127045
Q61703	Inter-alpha-trypsin inhibitor heavy chain H2 OS=Mus musculus OX=10090 GN=Itih2 PE=1 SV=1	2.8278	0.0127045
P28665	Murinoglobulin-1 OS=Mus musculus OX=10090 GN=Mug1 PE=1 SV=3	2.82086	0.00940689
G3UZM8	Apolipoprotein E (Fragment) OS=Mus musculus OX=10090 GN=Apoe PE=1 SV=1	2.81189	0.0254061
P11680	Properdin OS=Mus musculus OX=10090 GN=Cfp PE=2 SV=2	2.76733	0.0133453
A0A075B5P6	Immunoglobulin heavy constant mu (Fragment) OS=Mus musculus OX=10090 GN=Ighm PE=1 SV=1	2.76208	0.0118778
D3YUI3	Pregnancy zone protein (Fragment) OS=Mus musculus OX=10090 GN=Pzp PE=1 SV=1	2.75577	0.0268198
Q00724	Retinol-binding protein 4 OS=Mus musculus OX=10090 GN=Rbp4 PE=1 SV=2	2.75127	0.0184837
H7BWY6	Retinol-binding protein 4 OS=Mus musculus OX=10090 GN=Rbp4 PE=1 SV=1	2.75127	0.0184837
A0A075B6A0	Immunoglobulin heavy constant mu (Fragment) OS=Mus musculus OX=10090 GN=Ighm PE=1 SV=2	2.74932	0.0119698
D3Z2B2	Kininogen-1 (Fragment) OS=Mus musculus OX=10090 GN=Kng1 PE=1 SV=8	2.72961	0.0127663
A0A1B0GS57	Hemopexin (Fragment) OS=Mus musculus OX=10090 GN=Hpx PE=1 SV=1	2.72053	0.00838181
P30275	Creatine kinase U-type, mitochondrial OS=Mus musculus OX=10090 GN=Ckmt1 PE=1 SV=1	2.71697	0.00525964
A0A0G2JGM6	Vitamin D-binding protein (Fragment) OS=Mus musculus OX=10090 GN=Gc PE=1 SV=1	2.7165	0.010602
P01872	Immunoglobulin heavy constant mu OS=Mus musculus OX=10090 GN=Ighm PE=1 SV=2	2.69653	0.0133446
P33622	Apolipoprotein C-III OS=Mus musculus OX=10090 GN=Apoc3 PE=1 SV=2	2.63894	0.00940482
A0A0R4J1N3	Apolipoprotein C-III OS=Mus musculus OX=10090 GN=Apoc3 PE=1 SV=1	2.63894	0.00940482
E9QP56	Apolipoprotein C-III OS=Mus musculus OX=10090 GN=Apoc3 PE=1 SV=1	2.63894	0.00940482
Q61838	Pregnancy zone protein OS=Mus musculus OX=10090 GN=Pzp PE=1 SV=3	2.57976	0.0253198
P09813	Apolipoprotein A-II OS=Mus musculus OX=10090 GN=Apoa2 PE=1 SV=2	2.57403	0.00134994
A0A0R4J0I1	MCG1051009 OS=Mus musculus OX=10090 GN=Serpina3k PE=1 SV=1	2.55344	0.0160772
P01865	Ig gamma-2A chain C region, membrane-bound form OS=Mus musculus OX=10090 GN=Igh-1a PE=1 SV=3	2.54255	0.0297409
P01863	Ig gamma-2A chain C region, A allele OS=Mus musculus OX=10090 GN=Ighg PE=1 SV=1	2.54255	0.0297409
E9PYP1	Carboxylic ester hydrolase OS=Mus musculus OX=10090 GN=Ces1a PE=1 SV=1	2.5287	0.0340679
Q80X76	Serine protease inhibitor A3F OS=Mus musculus OX=10090 GN=Serpina3f PE=1 SV=3	2.47643	0.0332722
A0A0A6YXW6	Immunoglobulin heavy constant alpha (Fragment) OS=Mus musculus OX=10090 GN=Igha PE=1 SV=1	2.44162	0.00544191
A0A075B6A3	Immunoglobulin heavy constant alpha (Fragment) OS=Mus musculus OX=10090 GN=Igha PE=1 SV=1	2.44162	0.00544191
P07309	Transthyretin OS=Mus musculus OX=10090 GN=Ttr PE=1 SV=1	2.4006	0.0120754
Q5I2A0	Serine protease inhibitor A3G OS=Mus musculus OX=10090 GN=Serpina3g PE=1 SV=2	2.36156	0.0435677
F2Z405	Serine protease inhibitor A3G OS=Mus musculus OX=10090 GN=Serpina3g PE=1 SV=1	2.36156	0.0435677
E9Q499	Serine protease inhibitor A3G (Fragment) OS=Mus musculus OX=10090 GN=Serpina3g PE=1 SV=8	2.36156	0.0435677
Q61247	Alpha-2-antiplasmin OS=Mus musculus OX=10090 GN=Serpinf2 PE=1 SV=1	2.34952	0.0118754
P52430	Serum paraoxonase/arylesterase 1 OS=Mus musculus OX=10090 GN=Pon1 PE=1 SV=2	2.31265	0.0492145
H3BK03	Serum paraoxonase/arylesterase 1 (Fragment) OS=Mus musculus OX=10090 GN=Pon1 PE=1 SV=9	2.31265	0.0492145
P01027	Complement C3 OS=Mus musculus OX=10090 GN=C3 PE=1 SV=3	2.30966	0.0373529
Q01339	Beta-2-glycoprotein 1 OS=Mus musculus OX=10090 GN=Apoh PE=1 SV=1	2.2595	0.0202833
H9H9R5	Plasma kallikrein OS=Mus musculus OX=10090 GN=Klkb1 PE=1 SV=2	2.24004	0.0365969
Q91X72	Hemopexin OS=Mus musculus OX=10090 GN=Hpx PE=1 SV=2	2.21464	0.0324588
Q07456	Protein AMBP OS=Mus musculus OX=10090 GN=Ambp PE=1 SV=2	2.20691	0.0406631
A0A0A6YX70	Antithrombin-III (Fragment) OS=Mus musculus OX=10090 GN=Serpinc1 PE=1 SV=1	2.18281	0.0250896
Q8K0C5	Zymogen granule membrane protein 16 OS=Mus musculus OX=10090 GN=Zg16 PE=1 SV=1	2.16209	0.00427041
P21614	Vitamin D-binding protein OS=Mus musculus OX=10090 GN=Gc PE=1 SV=2	2.15409	0.0185789
F7CJN9	Transferrin (Fragment) OS=Mus musculus OX=10090 GN=Trf PE=4 SV=1	2.14996	0.0359892
I7HPW5	Beta-2-glycoprotein 1 (Fragment) OS=Mus musculus OX=10090 GN=Apoh PE=1 SV=1	2.1437	0.011588
I7HJR3	Beta-2-glycoprotein 1 (Fragment) OS=Mus musculus OX=10090 GN=Apoh PE=1 SV=1	2.12962	0.0282381
Q00897	Alpha-1-antitrypsin 1-4 OS=Mus musculus OX=10090 GN=Serpina1d PE=1 SV=1	2.10998	0.0354626
F7BAE9	Transferrin (Fragment) OS=Mus musculus OX=10090 GN=Trf PE=1 SV=1	2.10958	0.0365969
E9Q035	Predicted gene 20425 OS=Mus musculus OX=10090 GN=Gm20425 PE=4 SV=1	2.06758	0.0413051
Q921I1	Serotransferrin OS=Mus musculus OX=10090 GN=Tf PE=1 SV=1	2.04765	0.04176
P01837	Immunoglobulin kappa constant OS=Mus musculus OX=10090 GN=Igkc PE=1 SV=2	2.04639	0.00707899
D6RGQ0	Complement factor H OS=Mus musculus OX=10090 GN=Cfh PE=1 SV=1	2.02953	0.0206249
A0A1L1STX7	Apolipoprotein A-I (Fragment) OS=Mus musculus OX=10090 GN=Apoa1 PE=1 SV=1	1.99943	0.00586435
O08677	Kininogen-1 OS=Mus musculus OX=10090 GN=Kng1 PE=1 SV=1	1.98853	0.0408357
D3YTY9	Kininogen-1 OS=Mus musculus OX=10090 GN=Kng1 PE=1 SV=1	1.98853	0.0408357
A0A0R4J038	Kininogen-1 OS=Mus musculus OX=10090 GN=Kng1 PE=1 SV=1	1.98853	0.0408357
P02816	Prolactin-inducible protein homolog OS=Mus musculus OX=10090 GN=Pip PE=2 SV=3	1.95783	0.00586435
A0A0N4SV85	Prolactin induced protein, isoform CRA_a OS=Mus musculus OX=10090 GN=Pip PE=4 SV=1	1.95783	0.00586435
A0A0A6YWH7	Antithrombin-III (Fragment) OS=Mus musculus OX=10090 GN=Serpinc1 PE=1 SV=1	1.9524	0.00332151
P29699	Alpha-2-HS-glycoprotein OS=Mus musculus OX=10090 GN=Ahsg PE=1 SV=1	1.9349	0.0363404
A0A338P703	Alpha-2-HS-glycoprotein OS=Mus musculus OX=10090 GN=Ahsg PE=1 SV=1	1.93432	0.0380804
A0A338P7H5	Alpha-2-HS-glycoprotein OS=Mus musculus OX=10090 GN=Ahsg PE=1 SV=1	1.93432	0.0380804
A0A338P7G1	Alpha-2-HS-glycoprotein OS=Mus musculus OX=10090 GN=Ahsg PE=1 SV=1	1.93432	0.0380804
Q00623	Apolipoprotein A-I OS=Mus musculus OX=10090 GN=Apoa1 PE=1 SV=2	1.9317	0.0113805
A0A338P6Y6	Alpha-2-HS-glycoprotein OS=Mus musculus OX=10090 GN=Ahsg PE=1 SV=1	1.90191	0.0354626
E9Q8I0	Complement factor H OS=Mus musculus OX=10090 GN=Cfh PE=1 SV=1	1.8781	0.0298016
P06909	Complement factor H OS=Mus musculus OX=10090 GN=Cfh PE=1 SV=2	1.8781	0.0298016
P06728	Apolipoprotein A-IV OS=Mus musculus OX=10090 GN=Apoa4 PE=1 SV=3	1.87757	0.0436878
E9Q8H9	Complement factor H OS=Mus musculus OX=10090 GN=Cfh PE=1 SV=2	1.83879	0.0310629
P32261	Antithrombin-III OS=Mus musculus OX=10090 GN=Serpinc1 PE=1 SV=1	1.83237	0.00827847
Q9EQI5	Chemokine (C-X-C motif) ligand 7, isoform CRA_b OS=Mus musculus OX=10090 GN=Ppbp PE=1 SV=1	1.6228	0.0200504
E9Q7P9	Cadherin-related family member 2 OS=Mus musculus OX=10090 GN=Cdhr2 PE=1 SV=1	1.52279	0.0352971
Q7M758	N-acetylated-alpha-linked acidic dipeptidase-like protein OS=Mus musculus OX=10090 GN=Naaladl1 PE=2 SV=1	-1.23275	0.0363404
B2RS76	Carboxypeptidase B1 (Tissue), isoform CRA_b OS=Mus musculus OX=10090 GN=Cpb1 PE=1 SV=1	-1.41429	0.0298016
Q02053	Ubiquitin-like modifier-activating enzyme 1 OS=Mus musculus OX=10090 GN=Uba1 PE=1 SV=1	-1.56653	0.0476375
Q9D7Z6	Calcium-activated chloride channel regulator 1 OS=Mus musculus OX=10090 GN=Clca1 PE=1 SV=2	-1.57263	0.0408357
Q504N0	Carboxypeptidase A2 OS=Mus musculus OX=10090 GN=Cpa2 PE=1 SV=1	-1.6489	0.00600269
A0A1W2P7X3	Low molecular weight phosphotyrosine protein phosphatase OS=Mus musculus OX=10090 GN=Acp1 PE=1 SV=1	-1.68717	0.00593304
E9PV24	Fibrinogen alpha chain OS=Mus musculus OX=10090 GN=Fga PE=1 SV=1	-1.7376	0.00433352
Q3V0K9	Plastin-1 OS=Mus musculus OX=10090 GN=Pls1 PE=1 SV=1	-1.81171	0.0484995
B7ZCM0	55 kDa erythrocyte membrane protein (Fragment) OS=Mus musculus OX=10090 GN=Mpp1 PE=1 SV=1	-1.84854	0.0133446
P26231	Catenin alpha-1 OS=Mus musculus OX=10090 GN=Ctnna1 PE=1 SV=1	-1.94172	0.0363404
E9Q3X0	Major vault protein OS=Mus musculus OX=10090 GN=Mvp PE=1 SV=1	-1.95827	0.0322261
Q9EQK5	Major vault protein OS=Mus musculus OX=10090 GN=Mvp PE=1 SV=4	-1.95827	0.0322261
Q8VDD5	Myosin-9 OS=Mus musculus OX=10090 GN=Myh9 PE=1 SV=4	-1.97659	0.049269
Q9CR35	Chymotrypsinogen B OS=Mus musculus OX=10090 GN=Ctrb1 PE=1 SV=1	-2.05334	0.0348528
A0A087WSP1	Mucin-2 (Fragment) OS=Mus musculus OX=10090 GN=Muc2 PE=1 SV=1	-2.06593	0.0397836
Q62393	Tumor protein D52 OS=Mus musculus OX=10090 GN=Tpd52 PE=1 SV=2	-2.07635	0.0306375
E9PUA7	Tumor protein D52 OS=Mus musculus OX=10090 GN=Tpd52 PE=1 SV=1	-2.07635	0.0306375
F8WHQ1	Tumor protein D52 OS=Mus musculus OX=10090 GN=Tpd52 PE=1 SV=1	-2.07635	0.0306375
D3Z7X7	Tumor protein D52 (Fragment) OS=Mus musculus OX=10090 GN=Tpd52 PE=1 SV=1	-2.07635	0.0306375
D3Z125	Tumor protein D52 (Fragment) OS=Mus musculus OX=10090 GN=Tpd52 PE=1 SV=1	-2.07635	0.0306375
D3Z637	MCG10134, isoform CRA_c OS=Mus musculus OX=10090 GN=Tpd52 PE=1 SV=1	-2.07635	0.0306375
D3Z6J7	Plastin-1 (Fragment) OS=Mus musculus OX=10090 GN=Pls1 PE=1 SV=1	-2.09189	0.03752
Q8BPW9	Aspartyl aminopeptidase OS=Mus musculus OX=10090 GN=Dnpep PE=1 SV=1	-2.09774	0.0310629
Q3TVK3	Aspartyl aminopeptidase OS=Mus musculus OX=10090 GN=Dnpep PE=1 SV=1	-2.09774	0.0310629
Q9Z2W0	Aspartyl aminopeptidase OS=Mus musculus OX=10090 GN=Dnpep PE=1 SV=2	-2.09774	0.0310629
A2AIM5	Tropomyosin beta chain (Fragment) OS=Mus musculus OX=10090 GN=Tpm2 PE=1 SV=8	-2.1106	0.0499529
Q91XA9	Acidic mammalian chitinase OS=Mus musculus OX=10090 GN=Chia PE=1 SV=2	-2.11889	0.000938685
F8VQM5	Sucrase isomaltase (alpha-glucosidase) OS=Mus musculus OX=10090 GN=Sis PE=1 SV=1	-2.14801	0.00418912
P37804	Transgelin OS=Mus musculus OX=10090 GN=Tagln PE=1 SV=3	-2.16405	0.0354626
B7ZCL9	55 kDa erythrocyte membrane protein (Fragment) OS=Mus musculus OX=10090 GN=Mpp1 PE=1 SV=1	-2.31075	0.00173454
D3YWM4	Propionyl-CoA carboxylase alpha chain, mitochondrial (Fragment) OS=Mus musculus OX=10090 GN=Pcca PE=1 SV=8	-2.33901	0.0206249
H3BIV5	A-kinase anchor protein 5 OS=Mus musculus OX=10090 GN=Akap5 PE=1 SV=1	-2.3409	0.0346337
D3YVF0	A-kinase anchor protein 5 OS=Mus musculus OX=10090 GN=Akap5 PE=1 SV=2	-2.3409	0.0346337
Q9D358	Low molecular weight phosphotyrosine protein phosphatase OS=Mus musculus OX=10090 GN=Acp1 PE=1 SV=3	-2.36605	0.000488188
O55042	Alpha-synuclein OS=Mus musculus OX=10090 GN=Snca PE=1 SV=2	-2.38277	0.00262298
E9Q9C6	Fc fragment of IgG-binding protein OS=Mus musculus OX=10090 GN=Fcgbp PE=1 SV=1	-2.39634	0.00344703
F8WGM8	Actin, cytoplasmic 2 (Fragment) OS=Mus musculus OX=10090 GN=Actg1 PE=1 SV=1	-2.45687	0.0437064
E9Q1F2	Actin, cytoplasmic 1 OS=Mus musculus OX=10090 GN=Actb PE=1 SV=1	-2.46231	0.0476375
E9Q0B5	Fc fragment of IgG-binding protein OS=Mus musculus OX=10090 GN=Fcgbp PE=1 SV=1	-2.46621	0.00324097
P42125	Enoyl-CoA delta isomerase 1, mitochondrial OS=Mus musculus OX=10090 GN=Eci1 PE=1 SV=2	-2.50396	0.0499529
E9Q9J0	Ubiquitin-60S ribosomal protein L40 (Fragment) OS=Mus musculus OX=10090 GN=Uba52 PE=4 SV=1	-2.53614	0.0297409
P0CG49	Polyubiquitin-B OS=Mus musculus OX=10090 GN=Ubb PE=2 SV=1	-2.53614	0.0297409
E9Q5F6	Polyubiquitin-C (Fragment) OS=Mus musculus OX=10090 GN=Ubc PE=1 SV=1	-2.53614	0.0297409
A0A0A6YW67	MCG23377, isoform CRA_b OS=Mus musculus OX=10090 GN=Gm8797 PE=4 SV=1	-2.53614	0.0297409
E9Q4P0	KxDL motif-containing protein 1 (Fragment) OS=Mus musculus OX=10090 GN=Kxd1 PE=1 SV=1	-2.53614	0.0297409
P0CG50	Polyubiquitin-C OS=Mus musculus OX=10090 GN=Ubc PE=1 SV=2	-2.53614	0.0297409
Q5SX22	Polyubiquitin-B (Fragment) OS=Mus musculus OX=10090 GN=Ubb PE=4 SV=2	-2.53614	0.0297409
A0A0U1RPU7	Flavin reductase (NADPH) OS=Mus musculus OX=10090 GN=Blvrb PE=1 SV=1	-2.57363	0.00195168
P62983	Ubiquitin-40S ribosomal protein S27a OS=Mus musculus OX=10090 GN=Rps27a PE=1 SV=2	-2.60251	0.0499529
P60710	Actin, cytoplasmic 1 OS=Mus musculus OX=10090 GN=Actb PE=1 SV=1	-2.6172	0.0360481
P63260	Actin, cytoplasmic 2 OS=Mus musculus OX=10090 GN=Actg1 PE=1 SV=1	-2.6172	0.0360481
Q497K7	Transmembrane protein 247 OS=Mus musculus OX=10090 GN=Tmem247 PE=1 SV=2	-2.63355	0.0410753
D3YYQ4	Carbonic anhydrase 1 (Fragment) OS=Mus musculus OX=10090 GN=Car1 PE=1 SV=1	-2.68281	0.0014564
B1ARR6	Alpha-enolase (Fragment) OS=Mus musculus OX=10090 GN=Eno1 PE=1 SV=1	-2.69489	0.0453648
E9Q5F4	Actin, cytoplasmic 1 (Fragment) OS=Mus musculus OX=10090 GN=Actb PE=1 SV=1	-2.74947	0.0313561
A0A1W2P733	C-1-tetrahydrofolate synthase, cytoplasmic OS=Mus musculus OX=10090 GN=Mthfd1 PE=1 SV=1	-2.81235	0.0493348
Q80X90	Filamin-B OS=Mus musculus OX=10090 GN=Flnb PE=1 SV=3	-2.87939	0.000938685
Q91ZA3	Propionyl-CoA carboxylase alpha chain, mitochondrial OS=Mus musculus OX=10090 GN=Pcca PE=1 SV=2	-2.88323	0.00742088
A0A1W2P870	DNA segment, Chr 10, Johns Hopkins University 81-expressed (Fragment) OS=Mus musculus OX=10090 GN=D10Jhu81e PE=1 SV=1	-2.89977	0.0489271
E0CZ90	Proteasome activator complex subunit 2 (Fragment) OS=Mus musculus OX=10090 GN=Psme2 PE=1 SV=1	-2.90642	0.000611916
Q922D8	C-1-tetrahydrofolate synthase, cytoplasmic OS=Mus musculus OX=10090 GN=Mthfd1 PE=1 SV=4	-2.92748	0.0435483
E9PZC3	Flavin reductase (NADPH) OS=Mus musculus OX=10090 GN=Blvrb PE=1 SV=1	-2.95299	0.00206796
Q91VB8	Alpha globin 1 OS=Mus musculus OX=10090 GN=Hba-a1 PE=1 SV=1	-2.97677	0.00176149
Q923D2	Flavin reductase (NADPH) OS=Mus musculus OX=10090 GN=Blvrb PE=1 SV=3	-2.98416	0.00186395
P60766	Cell division control protein 42 homolog OS=Mus musculus OX=10090 GN=Cdc42 PE=1 SV=2	-3.00971	0.00725292
A0A0U1RNJ1	Fatty acid synthase OS=Mus musculus OX=10090 GN=Fasn PE=1 SV=1	-3.02443	0.0414123
A0A0A6YXF6	Transforming protein RhoA (Fragment) OS=Mus musculus OX=10090 GN=Rhoa PE=1 SV=1	-3.03729	0.0284138
P16406	Glutamyl aminopeptidase OS=Mus musculus OX=10090 GN=Enpep PE=1 SV=1	-3.03789	0.0187813
E9Q606	Actin, cytoplasmic 1 (Fragment) OS=Mus musculus OX=10090 GN=Actb PE=1 SV=1	-3.04843	0.0328905
P19096	Fatty acid synthase OS=Mus musculus OX=10090 GN=Fasn PE=1 SV=2	-3.0513	0.0408357
Q9QUI0	Transforming protein RhoA OS=Mus musculus OX=10090 GN=Rhoa PE=1 SV=1	-3.07355	0.0322261
F6ZV59	Heterogeneous nuclear ribonucleoprotein D0 (Fragment) OS=Mus musculus OX=10090 GN=Hnrnpd PE=1 SV=1	-3.1176	0.0310629
G3X9W0	Heterogeneous nuclear ribonucleoprotein D, isoform CRA_a OS=Mus musculus OX=10090 GN=Hnrnpd PE=1 SV=1	-3.1176	0.0310629
G5E8G0	Heterogeneous nuclear ribonucleoprotein D, isoform CRA_b OS=Mus musculus OX=10090 GN=Hnrnpd PE=1 SV=1	-3.1176	0.0310629
Q60668	Heterogeneous nuclear ribonucleoprotein D0 OS=Mus musculus OX=10090 GN=Hnrnpd PE=1 SV=2	-3.12084	0.0311427
J3QPS8	Eukaryotic translation initiation factor 5A-1 OS=Mus musculus OX=10090 GN=Eif5a PE=1 SV=1	-3.15427	0.0354626
P97372	Proteasome activator complex subunit 2 OS=Mus musculus OX=10090 GN=Psme2 PE=1 SV=4	-3.16393	0.000459112
G3X9V0	MCG22048, isoform CRA_a OS=Mus musculus OX=10090 GN=Psme2 PE=1 SV=1	-3.16393	0.000459112
Q8CB58	MCG13402, isoform CRA_d OS=Mus musculus OX=10090 GN=Ptbp1 PE=1 SV=1	-3.17526	0.0496904
P60843	Eukaryotic initiation factor 4A-I OS=Mus musculus OX=10090 GN=Eif4a1 PE=1 SV=1	-3.17941	0.0234566
A8DUK4	Beta-globin OS=Mus musculus OX=10090 GN=Hbb-bs PE=1 SV=1	-3.22695	0.00152386
P02104	Hemoglobin subunit epsilon-Y2 OS=Mus musculus OX=10090 GN=Hbb-y PE=1 SV=2	-3.23078	0.0014551
B0V2N5	Annexin (Fragment) OS=Mus musculus OX=10090 GN=Anxa2 PE=1 SV=1	-3.24111	0.00344703
P07356	Annexin A2 OS=Mus musculus OX=10090 GN=Anxa2 PE=1 SV=2	-3.24892	0.00567421
G3UYG0	Actin, cytoplasmic 2 OS=Mus musculus OX=10090 GN=Actg1 PE=1 SV=1	-3.25005	0.0310629
D3Z4A4	Peroxiredoxin-2 (Fragment) OS=Mus musculus OX=10090 GN=Prdx2 PE=1 SV=8	-3.3097	0.000256605
P48758	Carbonyl reductase [NADPH] 1 OS=Mus musculus OX=10090 GN=Cbr1 PE=1 SV=3	-3.32208	0.0498475
P62259	14-3-3 protein epsilon OS=Mus musculus OX=10090 GN=Ywhae PE=1 SV=1	-3.34722	0.0184934
P00920	Carbonic anhydrase 2 OS=Mus musculus OX=10090 GN=Ca2 PE=1 SV=4	-3.4819	0.00142613
P10639	Thioredoxin OS=Mus musculus OX=10090 GN=Txn PE=1 SV=3	-3.48316	0.0274261
P26041	Moesin OS=Mus musculus OX=10090 GN=Msn PE=1 SV=3	-3.49271	0.0149128
G3UZ07	Actin, cytoplasmic 2 (Fragment) OS=Mus musculus OX=10090 GN=Actg1 PE=1 SV=1	-3.49609	0.0147589
A0A1D5RM20	Actin, alpha skeletal muscle (Fragment) OS=Mus musculus OX=10090 GN=Acta1 PE=3 SV=1	-3.49691	0.0254061
F8WID5	Tropomyosin alpha-1 chain OS=Mus musculus OX=10090 GN=Tpm1 PE=1 SV=1	-3.50805	0.0219702
P48678	Prelamin-A/C OS=Mus musculus OX=10090 GN=Lmna PE=1 SV=2	-3.55483	0.0194831
A0A1L1ST52	Pyruvate kinase PKM (Fragment) OS=Mus musculus OX=10090 GN=Pkm PE=1 SV=1	-3.57382	0.00838181
E9Q397	Spectrin beta chain OS=Mus musculus OX=10090 GN=Sptb PE=1 SV=1	-3.57771	0.000284236
Q9EQP2	EH domain-containing protein 4 OS=Mus musculus OX=10090 GN=Ehd4 PE=1 SV=1	-3.60532	0.0155414
P15508	Spectrin beta chain, erythrocytic OS=Mus musculus OX=10090 GN=Sptb PE=1 SV=4	-3.60566	0.000219778
Q9WVA4	Transgelin-2 OS=Mus musculus OX=10090 GN=Tagln2 PE=1 SV=4	-3.60592	0.0141628
P52480	Pyruvate kinase PKM OS=Mus musculus OX=10090 GN=Pkm PE=1 SV=4	-3.62218	0.00746124
Q61171	Peroxiredoxin-2 OS=Mus musculus OX=10090 GN=Prdx2 PE=1 SV=3	-3.62704	0.000131825
Q3UGX2	Spectrin beta chain OS=Mus musculus OX=10090 GN=Sptb PE=1 SV=1	-3.64876	0.000218334
Q3TML0	Protein disulfide-isomerase A6 OS=Mus musculus OX=10090 GN=Pdia6 PE=1 SV=1	-3.65246	0.0380804
Q62261	Spectrin beta chain, non-erythrocytic 1 OS=Mus musculus OX=10090 GN=Sptbn1 PE=1 SV=2	-3.69913	0.007535
A0A0A0MQG2	Spectrin beta chain, non-erythrocytic 1 (Fragment) OS=Mus musculus OX=10090 GN=Sptbn1 PE=1 SV=1	-3.71206	0.00643688
Q8R164	Valacyclovir hydrolase OS=Mus musculus OX=10090 GN=Bphl PE=1 SV=1	-3.72934	0.0499529
A7M7S6	Hemoglobin X, alpha-like embryonic chain in Hba complex (Fragment) OS=Mus musculus OX=10090 GN=Hba-x PE=1 SV=1	-3.75479	0.00104325
P06467	Hemoglobin subunit zeta OS=Mus musculus OX=10090 GN=Hbz PE=2 SV=2	-3.75479	0.00104325
A0A286YE28	Transketolase (Fragment) OS=Mus musculus OX=10090 GN=Tkt PE=1 SV=1	-3.76103	0.0140228
B1ATQ3	Malate dehydrogenase, cytoplasmic (Fragment) OS=Mus musculus OX=10090 GN=Mdh1 PE=1 SV=8	-3.77615	0.0133446
A0A0A6YX78	Carbonic anhydrase 2 (Fragment) OS=Mus musculus OX=10090 GN=Car2 PE=1 SV=1	-3.79293	0.00104325
P20029	Endoplasmic reticulum chaperone BiP OS=Mus musculus OX=10090 GN=Hspa5 PE=1 SV=3	-3.80151	0.0499529
Q3UER8	Fibrinogen gamma chain OS=Mus musculus OX=10090 GN=Fgg PE=1 SV=1	-3.82119	0.0014564
Q8VCM7	Fibrinogen gamma chain OS=Mus musculus OX=10090 GN=Fgg PE=1 SV=1	-3.82119	0.0014564
Q922R8	Protein disulfide-isomerase A6 OS=Mus musculus OX=10090 GN=Pdia6 PE=1 SV=3	-3.82736	0.0279315
Q99JI6	Ras-related protein Rap-1b OS=Mus musculus OX=10090 GN=Rap1b PE=1 SV=2	-3.83281	0.0115338
A6ZI47	Fructose-bisphosphate aldolase OS=Mus musculus OX=10090 GN=Aldoart2 PE=1 SV=1	-3.87118	0.00173454
Q64727	Vinculin OS=Mus musculus OX=10090 GN=Vcl PE=1 SV=4	-3.87559	0.00559433
A2AN84	55 kDa erythrocyte membrane protein OS=Mus musculus OX=10090 GN=Mpp1 PE=1 SV=1	-3.88778	1.9143e-05
P70290	55 kDa erythrocyte membrane protein OS=Mus musculus OX=10090 GN=Mpp1 PE=1 SV=1	-3.88778	1.9143e-05
D3Z5E2	Heat shock cognate 71 kDa protein (Fragment) OS=Mus musculus OX=10090 GN=Hspa8 PE=1 SV=1	-3.91734	0.0279315
P09470	Angiotensin-converting enzyme OS=Mus musculus OX=10090 GN=Ace PE=1 SV=3	-3.92292	0.00115175
F8VPN3	Peptidyl-prolyl cis-trans isomerase OS=Mus musculus OX=10090 GN=Gm5160 PE=3 SV=2	-3.94918	0.0330048
A0A338P7C0	Proteasome subunit beta type-1 OS=Mus musculus OX=10090 GN=Psmb1 PE=1 SV=1	-3.97858	4.16877e-06
O09061	Proteasome subunit beta type-1 OS=Mus musculus OX=10090 GN=Psmb1 PE=1 SV=1	-3.97858	4.16877e-06
E9Q616	AHNAK nucleoprotein (desmoyokin) OS=Mus musculus OX=10090 GN=Ahnak PE=1 SV=1	-3.98709	0.0137891
Q08652	Retinol-binding protein 2 OS=Mus musculus OX=10090 GN=Rbp2 PE=2 SV=2	-4.00525	0.00344703
Q9CQI1	MCG1040641, isoform CRA_a OS=Mus musculus OX=10090 GN=Sftpa1 PE=1 SV=1	-4.01215	0.00332151
P35242	Pulmonary surfactant-associated protein A OS=Mus musculus OX=10090 GN=Sftpa1 PE=1 SV=1	-4.01215	0.00332151
P40142	Transketolase OS=Mus musculus OX=10090 GN=Tkt PE=1 SV=1	-4.02343	0.0119698
P68372	Tubulin beta-4B chain OS=Mus musculus OX=10090 GN=Tubb4b PE=1 SV=1	-4.06082	0.0014564
A0A1B0GRS2	L-lactate dehydrogenase A chain (Fragment) OS=Mus musculus OX=10090 GN=Ldha PE=1 SV=1	-4.06843	0.0014564
P17156	Heat shock-related 70 kDa protein 2 OS=Mus musculus OX=10090 GN=Hspa2 PE=1 SV=2	-4.08086	0.0244007
B7ZCL8	55 kDa erythrocyte membrane protein OS=Mus musculus OX=10090 GN=Mpp1 PE=1 SV=1	-4.11411	3.02402e-06
A0A1B0GSR9	L-lactate dehydrogenase OS=Mus musculus OX=10090 GN=Ldha PE=1 SV=1	-4.12775	0.00176149
B0V2N8	Annexin (Fragment) OS=Mus musculus OX=10090 GN=Anxa2 PE=1 SV=1	-4.13864	0.0014564
E9Q447	Spectrin alpha chain, non-erythrocytic 1 OS=Mus musculus OX=10090 GN=Sptan1 PE=1 SV=1	-4.15491	0.00600269
A3KGU9	Spectrin alpha chain, non-erythrocytic 1 OS=Mus musculus OX=10090 GN=Sptan1 PE=1 SV=2	-4.15491	0.00600269
A3KGU5	Spectrin alpha chain, non-erythrocytic 1 OS=Mus musculus OX=10090 GN=Sptan1 PE=1 SV=1	-4.15732	0.00600269
A3KGU7	Spectrin alpha chain, non-erythrocytic 1 OS=Mus musculus OX=10090 GN=Sptan1 PE=1 SV=1	-4.15732	0.00600269
P06151	L-lactate dehydrogenase A chain OS=Mus musculus OX=10090 GN=Ldha PE=1 SV=3	-4.1606	0.00173454
A0A1B0GSX0	L-lactate dehydrogenase OS=Mus musculus OX=10090 GN=Ldha PE=1 SV=1	-4.1606	0.00173454
A0A2R8VKI5	Myosin-9 (Fragment) OS=Mus musculus OX=10090 GN=Myh9 PE=1 SV=1	-4.17327	0.00047326
Q9CQ19	Myosin regulatory light polypeptide 9 OS=Mus musculus OX=10090 GN=Myl9 PE=1 SV=3	-4.18576	0.00940482
B0V2N7	Annexin (Fragment) OS=Mus musculus OX=10090 GN=Anxa2 PE=1 SV=1	-4.18829	0.0014564
P13634	Carbonic anhydrase 1 OS=Mus musculus OX=10090 GN=Ca1 PE=1 SV=4	-4.20888	5.3479e-05
P38060	Hydroxymethylglutaryl-CoA lyase, mitochondrial OS=Mus musculus OX=10090 GN=Hmgcl PE=1 SV=2	-4.22831	0.0363404
Q8VDN2	Sodium/potassium-transporting ATPase subunit alpha-1 OS=Mus musculus OX=10090 GN=Atp1a1 PE=1 SV=1	-4.2403	0.0185371
V9GX06	Predicted gene 11214 (Fragment) OS=Mus musculus OX=10090 GN=Gm11214 PE=1 SV=1	-4.29799	0.0440496
P40124	Adenylyl cyclase-associated protein 1 OS=Mus musculus OX=10090 GN=Cap1 PE=1 SV=4	-4.41418	0.000417553
Q8R146	Acylamino-acid-releasing enzyme OS=Mus musculus OX=10090 GN=Apeh PE=1 SV=3	-4.42629	1.81811e-05
A0A0R4J107	Acylamino-acid-releasing enzyme (Fragment) OS=Mus musculus OX=10090 GN=Apeh PE=1 SV=1	-4.42629	1.81811e-05
Q9DCD0	6-phosphogluconate dehydrogenase, decarboxylating OS=Mus musculus OX=10090 GN=Pgd PE=1 SV=3	-4.42632	6.65743e-06
P19001	Keratin, type I cytoskeletal 19 OS=Mus musculus OX=10090 GN=Krt19 PE=1 SV=1	-4.4329	0.00132913
A0A1B0GRW9	L-lactate dehydrogenase A chain (Fragment) OS=Mus musculus OX=10090 GN=Ldha PE=1 SV=1	-4.4419	0.00104325
A0A1B0GS79	L-lactate dehydrogenase A chain OS=Mus musculus OX=10090 GN=Ldha PE=1 SV=1	-4.4419	0.00104325
Q504P4	Heat shock cognate 71 kDa protein OS=Mus musculus OX=10090 GN=Hspa8 PE=1 SV=1	-4.44817	0.0176921
P20065	Thymosin beta-4 OS=Mus musculus OX=10090 GN=Tmsb4x PE=1 SV=1	-4.45968	0.00838181
Q9R111	Guanine deaminase OS=Mus musculus OX=10090 GN=Gda PE=1 SV=1	-4.4612	5.16256e-06
P08113	Endoplasmin OS=Mus musculus OX=10090 GN=Hsp90b1 PE=1 SV=2	-4.46631	0.0332722
A0A1L1SUV0	Pyruvate kinase PKM (Fragment) OS=Mus musculus OX=10090 GN=Pkm PE=1 SV=1	-4.4862	0.0010869
P63017	Heat shock cognate 71 kDa protein OS=Mus musculus OX=10090 GN=Hspa8 PE=1 SV=1	-4.49217	0.0175248
Q05816	Fatty acid-binding protein 5 OS=Mus musculus OX=10090 GN=Fabp5 PE=1 SV=3	-4.55171	0.00600269
P05064	Fructose-bisphosphate aldolase A OS=Mus musculus OX=10090 GN=Aldoa PE=1 SV=2	-4.56306	0.00173454
A6ZI44	Fructose-bisphosphate aldolase OS=Mus musculus OX=10090 GN=Aldoa PE=1 SV=1	-4.56306	0.00173454
A0A1L1STV8	Pyruvate kinase PKM (Fragment) OS=Mus musculus OX=10090 GN=Pkm PE=1 SV=1	-4.56816	0.00104325
A0A1L1SSN6	Pyruvate kinase PKM (Fragment) OS=Mus musculus OX=10090 GN=Pkm PE=1 SV=1	-4.56816	0.00104325
Q9ET54	Palladin OS=Mus musculus OX=10090 GN=Palld PE=1 SV=2	-4.57057	2.97072e-07
P14152	Malate dehydrogenase, cytoplasmic OS=Mus musculus OX=10090 GN=Mdh1 PE=1 SV=3	-4.5821	0.0158559
P08122	Collagen alpha-2(IV) chain OS=Mus musculus OX=10090 GN=Col4a2 PE=1 SV=4	-4.58477	0.0010869
A0A1L1SQV8	Pyruvate kinase PKM (Fragment) OS=Mus musculus OX=10090 GN=Pkm PE=1 SV=1	-4.58721	0.00104325
D3YWI1	Fructose-bisphosphate aldolase (Fragment) OS=Mus musculus OX=10090 GN=Aldoa PE=1 SV=8	-4.59065	0.00104325
E9PZC4	Flavin reductase (NADPH) OS=Mus musculus OX=10090 GN=Blvrb PE=1 SV=1	-4.59576	0.00169034
D3Z510	Fructose-bisphosphate aldolase A (Fragment) OS=Mus musculus OX=10090 GN=Aldoa PE=1 SV=2	-4.60037	0.00169034
A0A0U1RPN8	Fructose-bisphosphate aldolase A (Fragment) OS=Mus musculus OX=10090 GN=Aldoa PE=1 SV=1	-4.60037	0.00169034
P84078	ADP-ribosylation factor 1 OS=Mus musculus OX=10090 GN=Arf1 PE=1 SV=2	-4.617	0.00838181
P61205	ADP-ribosylation factor 3 OS=Mus musculus OX=10090 GN=Arf3 PE=2 SV=2	-4.617	0.00838181
F6QCP8	Angiotensin-converting enzyme (Fragment) OS=Mus musculus OX=10090 GN=Ace PE=1 SV=1	-4.6189	0.000299426
A0A1L1SU37	Pyruvate kinase PKM (Fragment) OS=Mus musculus OX=10090 GN=Pkm PE=1 SV=1	-4.67373	0.00104325
A0A1L1SST0	Peptidyl-prolyl cis-trans isomerase OS=Mus musculus OX=10090 GN=Ppia PE=1 SV=1	-4.7013	0.0215098
Q01853	Transitional endoplasmic reticulum ATPase OS=Mus musculus OX=10090 GN=Vcp PE=1 SV=4	-4.76102	0.00544191
A0A2I3BQ03	14-3-3 protein zeta/delta (Fragment) OS=Mus musculus OX=10090 GN=Ywhaz PE=1 SV=1	-4.79445	0.00602001
P63242	Eukaryotic translation initiation factor 5A-1 OS=Mus musculus OX=10090 GN=Eif5a PE=1 SV=2	-4.80553	0.00464375
D6RHN2	Methanethiol oxidase OS=Mus musculus OX=10090 GN=Selenbp1 PE=1 SV=1	-4.85808	0.0256873
P48036	Annexin A5 OS=Mus musculus OX=10090 GN=Anxa5 PE=1 SV=1	-4.87522	0.00616781
D3YU09	Guanine deaminase OS=Mus musculus OX=10090 GN=Gda PE=1 SV=1	-4.90705	4.4695e-07
H7BXC3	Triosephosphate isomerase OS=Mus musculus OX=10090 GN=Tpi1 PE=1 SV=1	-4.90787	0.0332722
P17742	Peptidyl-prolyl cis-trans isomerase A OS=Mus musculus OX=10090 GN=Ppia PE=1 SV=2	-4.91749	0.0185789
Q9QYB1	Chloride intracellular channel protein 4 OS=Mus musculus OX=10090 GN=Clic4 PE=1 SV=3	-4.9426	0.000218334
P04919	Band 3 anion transport protein OS=Mus musculus OX=10090 GN=Slc4a1 PE=1 SV=1	-5.03268	0.000506363
A0A0G2JEU1	Aldehyde dehydrogenase, mitochondrial OS=Mus musculus OX=10090 GN=Aldh2 PE=1 SV=1	-5.09739	0.0359892
P17751	Triosephosphate isomerase OS=Mus musculus OX=10090 GN=Tpi1 PE=1 SV=4	-5.12795	0.0312363
Q01768	Nucleoside diphosphate kinase B OS=Mus musculus OX=10090 GN=Nme2 PE=1 SV=1	-5.14875	0.017997
E9PXX7	Thioredoxin domain-containing protein 5 OS=Mus musculus OX=10090 GN=Txndc5 PE=1 SV=1	-5.1658	5.91945e-05
Q91W90	Thioredoxin domain-containing protein 5 OS=Mus musculus OX=10090 GN=Txndc5 PE=1 SV=2	-5.1658	5.91945e-05
P63101	14-3-3 protein zeta/delta OS=Mus musculus OX=10090 GN=Ywhaz PE=1 SV=1	-5.17558	0.00400094
A0A0R4J1Y7	Thioredoxin domain-containing protein 5 OS=Mus musculus OX=10090 GN=Txndc5 PE=1 SV=1	-5.21267	3.71596e-05
Q8QZT1	Acetyl-CoA acetyltransferase, mitochondrial OS=Mus musculus OX=10090 GN=Acat1 PE=1 SV=1	-5.2169	0.0202833
E9PZF0	Nucleoside diphosphate kinase OS=Mus musculus OX=10090 GN=Gm20390 PE=3 SV=1	-5.22593	0.0165035
A0A0U1RPT5	Fructose-bisphosphate aldolase A (Fragment) OS=Mus musculus OX=10090 GN=Aldoa PE=1 SV=1	-5.3316	0.00167842
D3YV98	Fructose-bisphosphate aldolase A (Fragment) OS=Mus musculus OX=10090 GN=Aldoa PE=1 SV=1	-5.3316	0.00167842
P26039	Talin-1 OS=Mus musculus OX=10090 GN=Tln1 PE=1 SV=2	-5.33472	0.00400094
A0A1B0GSL7	L-lactate dehydrogenase A chain (Fragment) OS=Mus musculus OX=10090 GN=Ldha PE=1 SV=1	-5.47053	0.00152386
Q61233	Plastin-2 OS=Mus musculus OX=10090 GN=Lcp1 PE=1 SV=4	-5.63444	0.000946878
F6YNX9	Carbonyl reductase [NADPH] 2 (Fragment) OS=Mus musculus OX=10090 GN=Cbr2 PE=1 SV=1	-5.85549	0.00162017
P08074	Carbonyl reductase [NADPH] 2 OS=Mus musculus OX=10090 GN=Cbr2 PE=1 SV=1	-6.00801	0.00285162
Q8K0E8	Fibrinogen beta chain OS=Mus musculus OX=10090 GN=Fgb PE=1 SV=1	-6.03738	0.0014564
O08709	Peroxiredoxin-6 OS=Mus musculus OX=10090 GN=Prdx6 PE=1 SV=3	-6.06449	0.0204696
A0A1B0GT41	L-lactate dehydrogenase A chain (Fragment) OS=Mus musculus OX=10090 GN=Ldha PE=1 SV=1	-6.07012	0.0014564
A0A1B0GQX5	L-lactate dehydrogenase OS=Mus musculus OX=10090 GN=Ldha PE=1 SV=1	-6.07012	0.0014564
O54724	Caveolae-associated protein 1 OS=Mus musculus OX=10090 GN=Cavin1 PE=1 SV=1	-6.11499	0.000773471
P24549	Retinal dehydrogenase 1 OS=Mus musculus OX=10090 GN=Aldh1a1 PE=1 SV=5	-6.13894	0.00336546
D3Z0Y2	Peroxiredoxin-6 OS=Mus musculus OX=10090 GN=Prdx6 PE=1 SV=1	-6.16365	0.0184934
P08032	Spectrin alpha chain, erythrocytic 1 OS=Mus musculus OX=10090 GN=Spta1 PE=1 SV=3	-6.18243	2.75897e-05
D3YZQ9	L-lactate dehydrogenase (Fragment) OS=Mus musculus OX=10090 GN=Ldha PE=1 SV=2	-6.18853	0.0014551
Q6GT24	Peroxiredoxin-6 OS=Mus musculus OX=10090 GN=Prdx6 PE=1 SV=1	-6.23218	0.0184784
P08228	Superoxide dismutase [Cu-Zn] OS=Mus musculus OX=10090 GN=Sod1 PE=1 SV=2	-6.3261	0.00775339
A0A0U1RQ96	Actin, gamma-enteric smooth muscle (Fragment) OS=Mus musculus OX=10090 GN=Actg2 PE=3 SV=1	-9.29339	5.89598e-09
D3Z2K3	Actin, gamma-enteric smooth muscle (Fragment) OS=Mus musculus OX=10090 GN=Actg2 PE=1 SV=1	-9.72501	9.89219e-10
D3YZY0	Actin, gamma-enteric smooth muscle (Fragment) OS=Mus musculus OX=10090 GN=Actg2 PE=1 SV=2	-9.73621	9.89219e-10
P63268	Actin, gamma-enteric smooth muscle OS=Mus musculus OX=10090 GN=Actg2 PE=1 SV=1	-9.86351	5.89598e-09
Q6IRU2	Tropomyosin alpha-4 chain OS=Mus musculus OX=10090 GN=Tpm4 PE=1 SV=3	-10.2453	3.20299e-07
